# Supplementary material for: An efficient protocol for the preparation of aldehydes/ketones and imines by an inorganic-ligand supported iron catalyst
Source: Royal Society of Chemistry journal article supplement (doi:10.1039/c8qo00833g), 2018-01-01
Supplement: c8qo00833g1.pdf [file c8qo00833g1.pdf]

## ***Electronic Supplementary Information***

### **An Efficient Protocol for the Preparation of Aldehydes/Ketones and Imines from Aerobic Oxidation of Organic Halides and Amines by Inorganic-ligand Supported Iron catalyst**

Yongyan Zhai,<sup>†a</sup> Mengqi Zhang,<sup>†a</sup> Haibin Fang<sup>†b</sup>, Shi, Ru,<sup>a</sup> Han Yu,<sup>\*a,b</sup> Wenshu Zhao,<sup>\*c</sup> and  
Yongge Wei<sup>\*b</sup>

<sup>a</sup> School of Chemical and Environmental Engineering, Shanghai Institute of Technology, Shanghai  
201418, P.R. China

<sup>b</sup> Key Lab of Organic Optoelectronics & Molecular Engineering of Ministry of Education,  
Department of Chemistry, Tsinghua University, Beijing 100084, P.R. China

<sup>c</sup> Longhua Hospital Shanghai University of Traditional Chinese Medicine, 725 South Wanping  
Road Shanghai 200032. P. R. China

\* E-mail: scihanyu@163.com, wenshuzhao005@163.com, yonggewei@mail.tsinghua.edu.cn.

## 1. General experimental conditions.

Fe-Anderson POM was prepared according to literature methods<sup>1,2</sup>. All reagents obtained from Sigma-Aldrich and Admas-beta were used without further purification. <sup>1</sup>H Nuclear Magnetic Resonance (<sup>1</sup>HNMR) spectra were recorded on Bruker AVANCE III 500 MHz (500 MHz for proton) spectrometer with tetramethylsilane as the internal reference using CDCl<sub>3</sub> or DMSO-d<sub>6</sub> as solvent in all cases, and chemical shifts were reported in parts per million (ppm, δ). FT-IR spectra were recorded on a Thermo fisher Nicolet 6700. GC analyses were performed on Shimadzu GC-2014 with a flame ionization detector equipped with an Rtx-1 capillary column (internal diameter = 0.25 mm, length = 30 m) or a Stabil wax capillary column (internal diameter = 0.25 mm, length = 30 m). GC mass spectra were recorded on Shimadzu GCMS-QP2010 with a capillary column (0.25 mm× 30 m). Column chromatography was performed using 200-300 mesh base-washed silica gel.

## 2. Synthesis and characterizations of the catalyst.

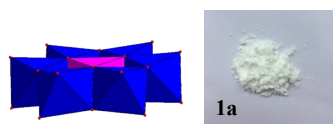

**1a:** (NH<sub>4</sub>)<sub>3</sub>[FeMo<sub>6</sub>O<sub>18</sub>(OH)<sub>6</sub>] (Fe<sup>III</sup>Mo<sub>6</sub>)

**Figure S1** (NH<sub>4</sub>)<sub>3</sub>[FeMo<sub>6</sub>O<sub>18</sub>(OH)<sub>6</sub>]

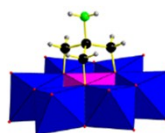

[[N(C<sub>4</sub>H<sub>9</sub>)<sub>4</sub>]<sub>3</sub>[FeMo<sub>6</sub>O<sub>18</sub>(OH)<sub>3</sub>{(OCH<sub>2</sub>)<sub>3</sub>CR}]]

**1b:** R=CH<sub>3</sub>; **1c:** R=NH<sub>2</sub>;

**1d:** R=NO<sub>2</sub>; **1e:** R=CH<sub>2</sub>OH

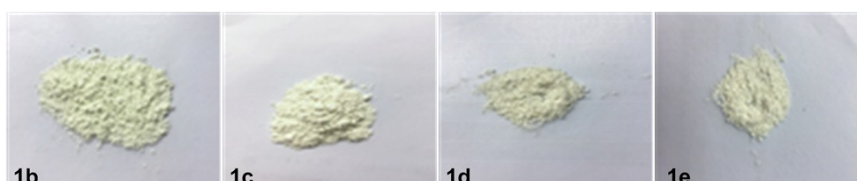

**Figure S2**  $[\text{N}(\text{C}_4\text{H}_9)_4]_3[\text{FeMo}_6\text{O}_{18}(\text{OH})_3\{(\text{OCH}_2)_3\text{CR}\}]$

**1b**  $[\text{N}(\text{C}_4\text{H}_9)_4]_3[\text{FeMo}_6\text{O}_{18}(\text{OH})_3\{(\text{OCH}_2)_3\text{CCH}_3\}]$  was synthesized according to our previous report and the literature procedure<sup>3-5</sup>:  $(\text{NH}_4)_3[\text{FeMo}_6\text{O}_{18}(\text{OH})_6]\cdot 7\text{H}_2\text{O}$  (2.5g, 2.0mmol),  $\text{CH}_3\text{C}(\text{CH}_2\text{OH})_3$  (0.36g, 3.0mmol) and  $\text{H}_2\text{O}$  (20mL) was refluxed for 24h. After the solution was cooled down to room temperature, tetrabutyl ammonium bromide (2.0 g, 6.1 mmol) was added and still stirred for 1h. Then the large white solid (3.0 g) appeared and filtered off for use.

**1c**  $[\text{N}(\text{C}_4\text{H}_9)_4]_3[\text{FeMo}_6\text{O}_{18}(\text{OH})_3\{(\text{OCH}_2)_3\text{CNH}_2\}]$  was synthesized according to our previous report and the literature procedure<sup>3-5</sup>:  $(\text{NH}_4)_3[\text{FeMo}_6\text{O}_{18}(\text{OH})_6]\cdot 7\text{H}_2\text{O}$  (2.5g, 2.0mmol),  $\text{NH}_2\text{C}(\text{CH}_2\text{OH})_3\cdot\text{HCl}$  (0.47g, 3.0mmol) and  $\text{H}_2\text{O}$  (20mL) was refluxed for 24h. After the solution was cooled down to room temperature, tetrabutyl ammonium bromide (2.0 g, 6.1 mmol) was added and still stirred for 1h. Then the large white solid (2.8 g) appeared and filtered off for use.

**1d**  $[\text{N}(\text{C}_4\text{H}_9)_4]_3[\text{FeMo}_6\text{O}_{18}(\text{OH})_3\{(\text{OCH}_2)_3\text{CNO}_2\}]$  was synthesized according to our previous report and the literature procedure<sup>3-5</sup>:  $(\text{NH}_4)_3[\text{FeMo}_6\text{O}_{18}(\text{OH})_6]\cdot 7\text{H}_2\text{O}$  (2.5g, 2.0mmol),  $\text{NO}_2\text{C}(\text{CH}_2\text{OH})_3$  (0.45g, 3.0mmol) and  $\text{H}_2\text{O}$  (20mL) was refluxed for 24h. After the solution was cooled down to room temperature, tetrabutyl ammonium bromide (2.0 g, 6.1 mmol) was added and still stirred for 1h. Then the large white solid (2.5 g) appeared and filtered off for use.

**1e**  $[\text{N}(\text{C}_4\text{H}_9)_4]_3[\text{FeMo}_6\text{O}_{18}(\text{OH})_3\{(\text{OCH}_2)_3\text{CCH}_2\text{OH}\}]$  was synthesized according to our previous report and the literature procedure<sup>3-5</sup>:  $(\text{NH}_4)_3[\text{FeMo}_6\text{O}_{18}(\text{OH})_6]\cdot 7\text{H}_2\text{O}$  (2.5g, 2.0mmol),  $\text{CH}_2\text{OHC}(\text{CH}_2\text{OH})_3$  (0.41g, 3.0mmol) and  $\text{H}_2\text{O}$  (20mL) was refluxed for 24h. After the solution was cooled down to room temperature, tetrabutyl ammonium bromide (2.0 g, 6.1 mmol) was added and still stirred for 1h. Then the large white solid (3.1 g) appeared and filtered off for use.

### 3. Optimization of reaction conditions

**Table S1** Investigation of catalysts 1<sup>a</sup>

c1ccccc1CCl (2a) + O<sub>2</sub> (1 atm)  $\xrightarrow[\text{CH}_3\text{CN (2 ml), 50 }^\circ\text{C}]{\text{Cat. 1 (1.0 mol\%)}}$  c1ccccc1C=O (3a)

(balloon)

| Entry | Cat.      | Time(h) | Yield(%) <sup>b</sup> |
|-------|-----------|---------|-----------------------|
| 1     | -         | 24      | <5                    |
| 2     | <b>1a</b> | 12      | 93                    |
| 3     | <b>1b</b> | 12      | 90                    |
| 4     | <b>1c</b> | 12      | 85                    |
| 5     | <b>1d</b> | 12      | 91                    |
| 6     | <b>1e</b> | 12      | 90                    |

<sup>a</sup> Reaction conditions: Cat. **1** (1.0 mol%), benzyl chloride (0.5 mmol), O<sub>2</sub> (1 atm), and CH<sub>3</sub>CN (2 mL) at 50°C. <sup>b</sup> Yields were determined by GC and confirmed by GC-MS.

**Table S2** Optimization of solvents <sup>a</sup>

c1ccccc1CCl (2a) + O<sub>2</sub> (1 atm)  $\xrightarrow[\text{solvent (2 ml), T } ^\circ\text{C, 12h}]{\text{Cat. 1 (1.0 mol\%)}}$  c1ccccc1C=O (3a)

(balloon)

| Entry | Solvent                         | Temperature | Yield(%) <sup>b</sup> |
|-------|---------------------------------|-------------|-----------------------|
| 1     | MeCN                            | 60°C        | 93                    |
| 2     | CH <sub>2</sub> Cl <sub>2</sub> | 35°C        | 28                    |
| 3     | Toluene                         | 60°C        | 33                    |
| 4     | Cyclohexane                     | 60°C        | 15                    |
| 5     | Acetone                         | 50°C        | 55                    |
| 6     | THF                             | 60°C        | 68                    |
| 7     | Dioxane                         | 60°C        | 82                    |
| 8     | DMF                             | 60°C        | 63                    |
| 9     | H <sub>2</sub> O                | 60°C        | 87                    |
| 10    | MeCN:H <sub>2</sub> O=1:1       | 60°C        | 99                    |

<sup>a</sup> Reaction conditions: Cat. **1** (1.0 mol%), benzyl chloride (0.5 mmol), O<sub>2</sub> (1 atm), and solvent (2 mL), 12h. <sup>b</sup> Yields were determined by GC and confirmed by GC-MS.

**Table S3** Optimization of reaction conditions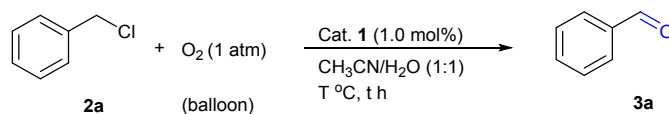

| Entry | Temperature | Time(h) | Yield(%) <sup>b</sup> |
|-------|-------------|---------|-----------------------|
| 1     | r.t.        | 24      | <5                    |
| 2     | 40          | 12      | 79                    |
| 3     | 50          | 12      | 90                    |
| 4     | 60          | 12      | 99                    |
| 5     | 70          | 12      | 99                    |

<sup>a</sup> Reaction conditions: Cat. **1** (1.0 mol%), benzyl chloride (0.5 mmol), O<sub>2</sub> (1 atm), and CH<sub>3</sub>CN (1 mL), H<sub>2</sub>O (1 mL). <sup>b</sup> Yields were determined by GC and confirmed by GC-MS.

**Table S4** Investigation of catalysts 1<sup>a</sup>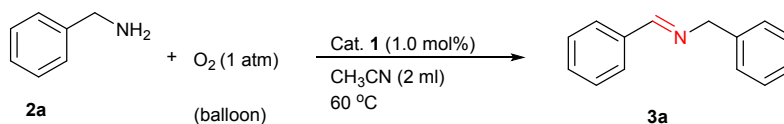

| Entry | Cat.                                                            | Time(h) | Sel.(%) <sup>b</sup> | Yield(%) <sup>b</sup> |
|-------|-----------------------------------------------------------------|---------|----------------------|-----------------------|
| 1     | -                                                               | 48      | -                    | -                     |
| 2     | <b>1a</b>                                                       | 24      | 99                   | 92                    |
| 3     | <b>1b</b>                                                       | 24      | 94                   | 91                    |
| 4     | <b>1c</b>                                                       | 24      | 88                   | 86                    |
| 5     | <b>1d</b>                                                       | 24      | 98                   | 90                    |
| 6     | <b>1e</b>                                                       | 24      | 97                   | 90                    |
| 7     | <b>Fe<sub>2</sub>(SO<sub>4</sub>)<sub>3</sub></b>               | 48      | -                    | -                     |
| 8     | <b>(NH<sub>4</sub>)<sub>6</sub>Mo<sub>7</sub>O<sub>24</sub></b> | 48      | -                    | -                     |

<sup>a</sup> Reaction conditions: Cat. **1** (1.0 mol%), amine (0.5 mmol), O<sub>2</sub> (1 atm), and CH<sub>3</sub>CN (2 mL) at 60°C. <sup>b</sup> Selectivity and yields were determined by GC and confirmed by GC-MS.

**Table S5** Optimization of reaction conditions<sup>a</sup>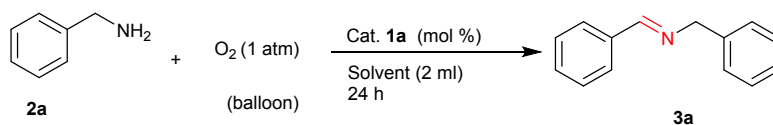

| Entry           | Solvent                         | Cat. (mol %) | Sel. (%) <sup>b</sup> | Yield(%) <sup>b</sup> |
|-----------------|---------------------------------|--------------|-----------------------|-----------------------|
| 1               | MeCN                            | 1            | 96                    | 95                    |
| 2               | Toluene                         | 1            | 69                    | 55                    |
| 3               | CH <sub>2</sub> Cl <sub>2</sub> | 1            | 68                    | 63                    |
| 4               | MeOH                            | 1            | 85                    | 81                    |
| 5               | THF                             | 1            | 90                    | 82                    |
| 6               | EA                              | 1            | 87                    | 79                    |
| 7               | dioxane                         | 1            | 92                    | 88                    |
| 8               | MeCN                            | 0.1          | 80                    | 78                    |
| 9               | MeCN                            | 0.5          | 88                    | 82                    |
| 10              | MeCN                            | 2            | 90                    | 88                    |
| 11 <sup>c</sup> | MeCN                            | 1            | 94                    | 85                    |
| 12 <sup>d</sup> | MeCN                            | 1            | 99                    | 98                    |
| 13 <sup>e</sup> | MeCN                            | 1            | 93                    | 90                    |
| 14 <sup>f</sup> | MeCN                            | 1            | -                     | -                     |
| 15 <sup>g</sup> | MeCN                            | 1            | 95                    | 92                    |

<sup>a</sup> Reaction conditions: amines (0.5 mmol), cat. **1a** (1.0 mol%), O<sub>2</sub> balloon (1 atm), and solvent (2.0 mL). <sup>b</sup> Yield and selectivity were determined by GC and confirmed by GC-MS. <sup>c</sup> at 50 °C. <sup>d</sup> at 70 °C. <sup>e</sup> Reactions were carried out under atmospheric air. <sup>f</sup> Reactions were carried out under N<sub>2</sub> atmosphere. <sup>g</sup> Reactions were carried out with H<sub>2</sub>O<sub>2</sub> as the sole oxidant.

**Table S6** Optimization of reaction conditions<sup>a</sup>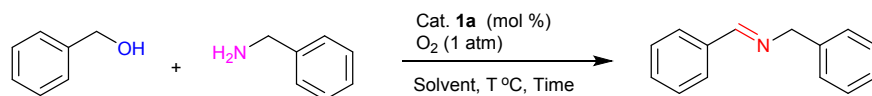

| Entry | Solvent                         | Cat. (mol %) | Time (h) | T (°C) | Yield (%) <sup>b</sup> |
|-------|---------------------------------|--------------|----------|--------|------------------------|
| 1     | CH <sub>3</sub> CN              | 1            | 12       | 50     | 95                     |
| 2     | Toluene                         | 1            | 12       | 50     | 76                     |
| 3     | CH <sub>2</sub> Cl <sub>2</sub> | 1            | 12       | 50     | 60                     |
| 5     | THF                             | 1            | 12       | 50     | 78                     |
| 6     | EA                              | 1            | 12       | 50     | 55                     |
| 7     | dioxane                         | 1            | 12       | 50     | 82                     |
| 8     | CH <sub>3</sub> CN              | 0.1          | 12       | 50     | 66                     |
| 9     | CH <sub>3</sub> CN              | 0.5          | 12       | 50     | 89                     |
| 11    | CH <sub>3</sub> CN              | 1            | 12       | 60     | 88                     |
| 12    | CH <sub>3</sub> CN              | 1            | 12       | 30     | 53                     |
| 13    | CH <sub>3</sub> CN              | 1            | 6        | 50     | 70                     |
| 14    | CH <sub>3</sub> CN              | 1            | 24       | 50     | 90                     |
| 15    | CH <sub>3</sub> CN              | 1            | 36       | 50     | 72                     |

<sup>a</sup> Reaction conditions: Cat **1a** (1.0 mol%), amine (0.5 mmol), alcohol (0.5 mmol), O<sub>2</sub> balloon (1 atm), CH<sub>3</sub>CN (3 mL).<sup>b</sup> Conversion and selectivity were determined by GC and confirmed by GC-MS.

#### 4. Recycling experiments of the catalyst for oxidative coupling reaction

After the oxidative coupling experiment, the iron catalyst **1a** were precipitated by adding diethyl ether to the reaction system, and then recovered for reuse. The recovered catalyst was characterized by IR (Fig. S3).

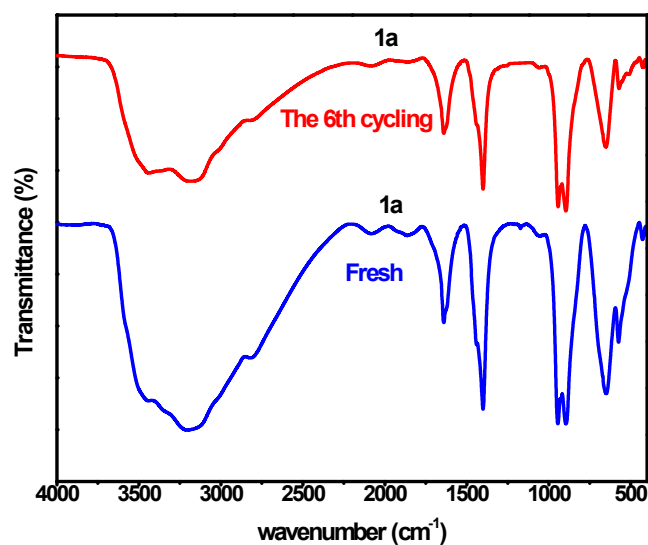

**Figure S3** IR spectra of the catalyst before and after reaction

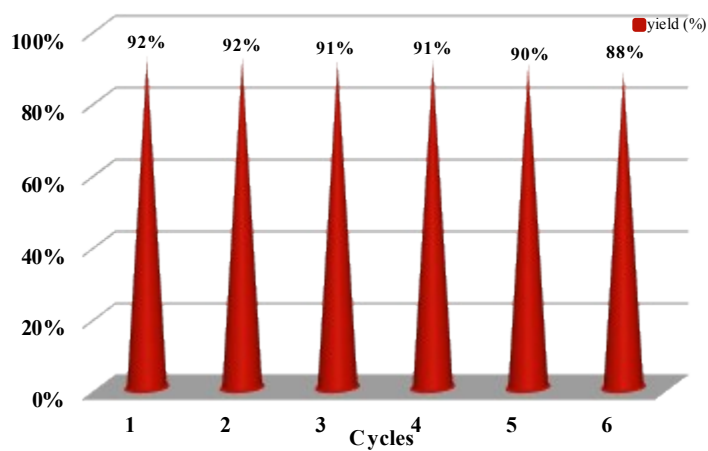

**Figure S4** Recycling experiments of catalyst, the first time reaction condition: Cat. **1a** (1.0 mol%), amine (20 mmol), O<sub>2</sub> balloon (1.0 atm), CH<sub>3</sub>CN (10 mL) at 70 °C for 24h.

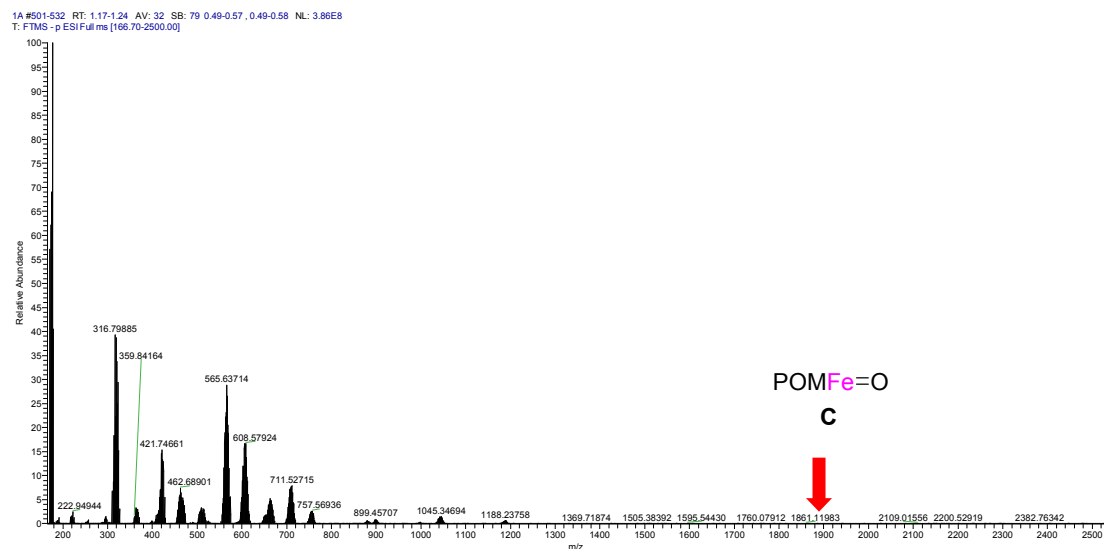

**Figure S5** ESI-MS of (NH<sub>4</sub>)<sub>3</sub>[FeMo<sub>6</sub>O<sub>18</sub>(OH)<sub>6</sub>]



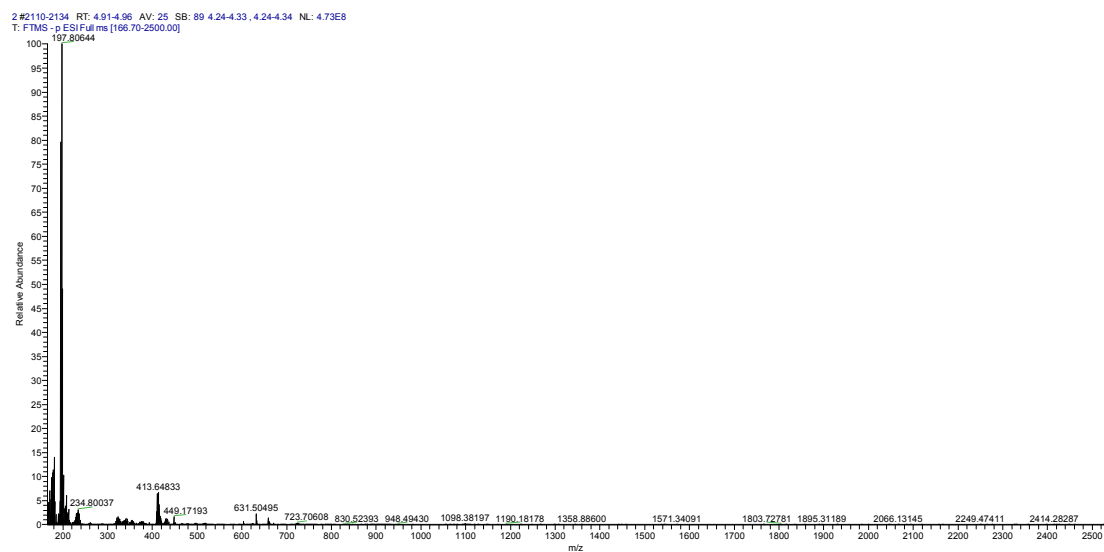

**FigureS6 ESI-MS of  $(\text{NH}_4)_3[\text{FeMo}_6\text{O}_{18}(\text{OH})_6] + \text{H}_2\text{O}_2$**

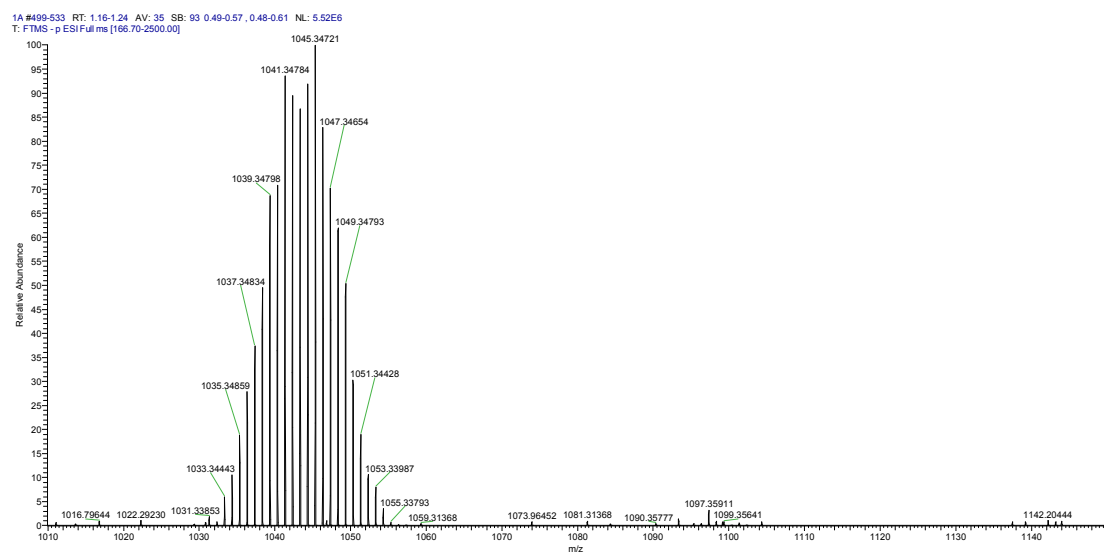

**FigureS7 Zoom the area of ESI-MS of  $(\text{NH}_4)_3[\text{FeMo}_6\text{O}_{18}(\text{OH})_6]$ , ( $m/z = 1010-1500$ ,  $\{\text{NH}_4\text{H}[\text{FeMo}_6\text{O}_{24}\text{H}_6]\}^{1-} = 1043.34 \text{ g/mol}$ )**

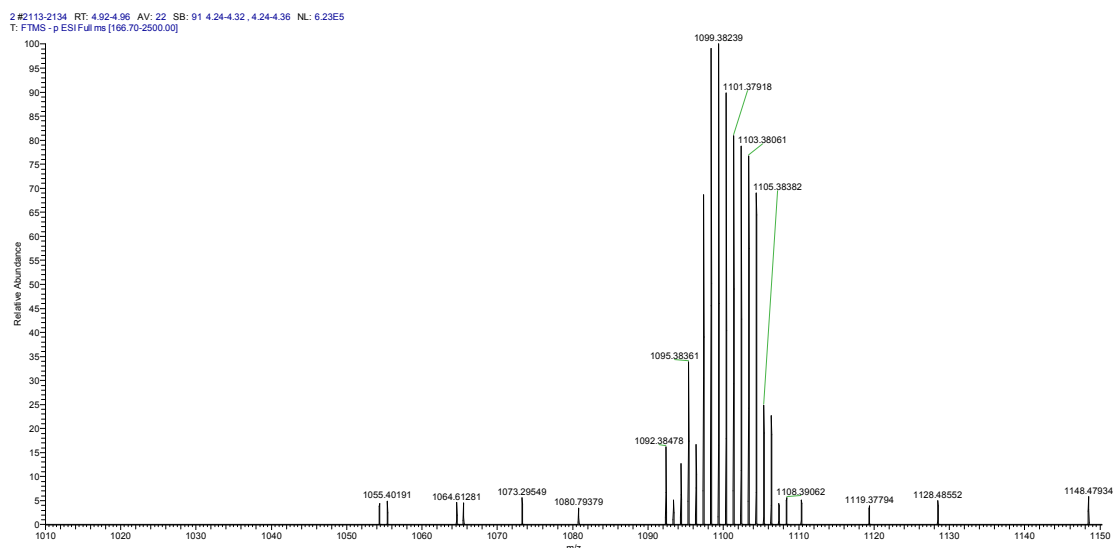

**Figure S8 Zoom the area of ESI-MS of  $(\text{NH}_4)_3[\text{FeMo}_6\text{O}_{18}(\text{OH})_6] + \text{O}_2$ , ( $m/z = 1010$ - $1500$ ,  $\{\text{Na}_2[\text{FeMo}_6\text{O}_{24}\text{H}_6] + \text{O}\}^{\cdot-} \cdot \text{H}_2\text{O} = 1100.61 \text{ g/mol}$ )**

## 5. Characterizations of typical products

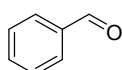

**Benzaldehyde (3a):** Light yellow liquid.  $^1\text{H}$  NMR (500 MHz,  $\text{CDCl}_3$ )  $\delta$  10.15 (s, 1H), 8.05 – 7.98 (m, 2H), 7.76 (t,  $J = 7.4 \text{ Hz}$ , 1H), 7.66 (t,  $J = 7.6 \text{ Hz}$ , 2H).

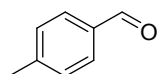

**4-methylbenzaldehyde (3b):** Yellow liquid.  $^1\text{H}$  NMR (500 MHz,  $\text{CDCl}_3$ )  $\delta$  10.03 (s, 1H), 7.85 (d,  $J = 8.1 \text{ Hz}$ , 2H), 7.39 (d,  $J = 7.9 \text{ Hz}$ , 2H), 2.49 (s, 3H).

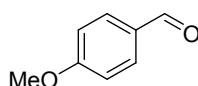

**4-methoxybenzaldehyde (3c):** Colorless liquid.  $^1\text{H}$  NMR (500 MHz,  $\text{CDCl}_3$ )  $\delta$  9.98 (s, 1H), 7.94 (d,  $J = 8.6 \text{ Hz}$ , 2H), 7.10 (d,  $J = 8.6 \text{ Hz}$ , 2H), 3.98 (s, 3H).

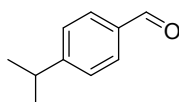

**4-isopropylbenzaldehyde (3d):** Yellow liquid.  $^1\text{H}$  NMR (500 MHz,  $\text{CDCl}_3$ )  $\delta$  10.14 (s, 1H), 7.99 (d,  $J = 8.1 \text{ Hz}$ , 2H), 7.54 (t,  $J = 15.2 \text{ Hz}$ , 2H), 3.16 (dt,  $J = 13.8, 6.9 \text{ Hz}$ , 1H), 1.45 (d,  $J = 7.0 \text{ Hz}$ , 6H).

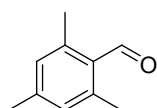

**4-isopropylbenzaldehyde (3e):** Yellow liquid.  $^1\text{H}$  NMR (500 MHz,  $\text{CDCl}_3$ )  $\delta$  10.73 (s, 1H), 7.07 (s, 2H), 2.76 (s, 6H), 2.49 (s, 3H).

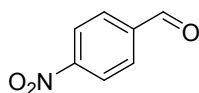

**4-nitrobenzaldehyde (3f):** White solid.  $^1\text{H}$  NMR (500 MHz,  $\text{CDCl}_3$ )  $\delta$  10.17 (s, 1H), 8.41 (d,  $J = 8.6$  Hz, 2H), 8.09 (d,  $J = 8.7$  Hz, 2H).

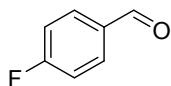

**4-fluorobenzaldehyde (3g):** Light yellow liquid.  $^1\text{H}$  NMR (500 MHz,  $\text{CDCl}_3$ )  $\delta$  10.08 (s, 1H), 8.02 (dd,  $J = 8.7, 5.5$  Hz, 2H), 7.32 (t,  $J = 8.5$  Hz, 2H).

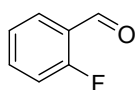

**2-fluorobenzaldehyde (3h):** Yellow liquid.  $^1\text{H}$  NMR (500 MHz,  $\text{CDCl}_3$ )  $\delta$  10.51 (d,  $J = 1.8$  Hz, 1H), 8.11 – 7.93 (m, 1H), 7.85 – 7.68 (m, 1H), 7.52 – 7.21 (m, 2H).

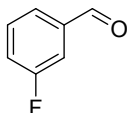

**3-fluorobenzaldehyde (3i):** Yellow liquid.  $^1\text{H}$  NMR (500 MHz,  $\text{CDCl}_3$ )  $\delta$  10.14 (d,  $J = 1.7$  Hz, 1H), 7.93 – 7.79 (m, 1H), 7.69 (ddd,  $J = 13.0, 7.9, 6.3$  Hz, 2H), 7.58 – 7.41 (m, 1H).

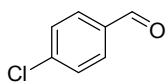

**4-chlorobenzaldehyde (3j):** Light yellow liquid.  $^1\text{H}$  NMR (500 MHz,  $\text{CDCl}_3$ )  $\delta$  10.17 (s, 1H), 8.01 (d,  $J = 8.3$  Hz, 2H), 7.70 (d,  $J = 8.4$  Hz, 2H).

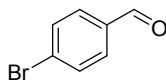

**4-bromobenzaldehyde (3k):** White solid.  $^1\text{H}$  NMR (500 MHz,  $\text{CDCl}_3$ )  $\delta$  9.98 (s, 1H), 7.72 (dd,  $J = 32.8, 8.4$  Hz, 4H).

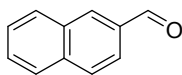

**2-naphthaldehyde (3l):** Light yellow solid.  $^1\text{H}$  NMR (500 MHz,  $\text{CDCl}_3$ )  $\delta$  10.16 (s, 1H), 8.35 (s, 1H), 8.09 – 7.83 (m, 4H), 7.62 (dt,  $J = 28.2, 7.4$  Hz, 2H).

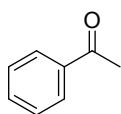

**Acetophenone (3n):** Light yellow oil.  $^1\text{H}$  NMR (500 MHz,  $\text{CDCl}_3$ )  $\delta$  8.19 – 8.05 (m, 2H), 7.78 – 7.50 (m, 3H), 2.83 – 2.68 (m, 3H).

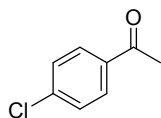

**1-(4-chlorophenyl)ethan-1-one (3o):** Light yellow liquid.  $^1\text{H}$  NMR (500 MHz,  $\text{CDCl}_3$ )  $\delta$  8.18 – 7.84 (m, 2H), 7.67 – 7.50 (m, 2H), 2.73 (d,  $J$  = 1.1 Hz, 3H).

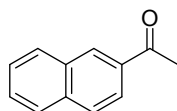

**1-(naphthalen-2-yl)ethan-1-one (3p):** White solid.  $^1\text{H}$  NMR (500 MHz,  $\text{CDCl}_3$ )  $\delta$  9.10 – 8.90 (m, 1H), 8.20 – 7.95 (m, 3H), 7.84 – 7.51 (m, 3H), 3.08 – 2.59 (m, 3H).

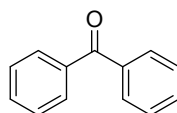

**Benzophenone (3q):** White solid.  $^1\text{H}$  NMR (500 MHz,  $\text{CDCl}_3$ )  $\delta$  7.99 (d,  $J$  = 7.4 Hz, 4H), 7.78 (t,  $J$  = 7.4 Hz, 2H), 7.67 (t,  $J$  = 7.6 Hz, 4H).

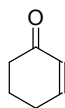

**Cyclohex-2-en-1-one (3r):** Light yellow liquid.  $^1\text{H}$  NMR (500 MHz,  $\text{CDCl}_3$ )  $\delta$  7.17 – 7.03 (m, 1H), 6.14 – 6.05 (m, 1H), 2.49 (ddd,  $J$  = 27.6, 7.1, 4.2 Hz, 4H), 2.19 – 1.99 (m, 2H).

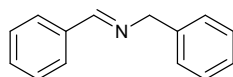

**N-benzyliden-1-phenylmethanamine (5a):** Yellow oil.  $^1\text{H}$  NMR (500 MHz,  $\text{CDCl}_3$ )  $\delta$  8.48 (s, 1H), 7.91 (dd,  $J$  = 6.6, 2.9 Hz, 2H), 7.56 – 7.50 (m, 3H), 7.49 – 7.42 (m, 4H), 7.38 (td,  $J$  = 5.1, 3.0 Hz, 1H), 4.93 (s, 2H). Data in accordance with that previously published<sup>6-11</sup>.

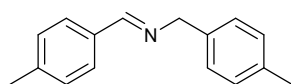

**N-(4-methylbenzylidene)-1-(p-tolyl)methanamine (5b):** White solid.  $^1\text{H}$  NMR (500MHz,  $\text{CDCl}_3$ )  $\delta$  8.36 (s, 1H), 7.68 (d,  $J$  = 8.0 Hz, 2H), 7.22 (d,  $J$  = 8.5 Hz, 4H), 7.18 (s, 2H), 4.79 (s, 2H), 2.40 (s, 3H), 2.36 (s, 3H). Data in accordance with that previously published<sup>6-11</sup>.

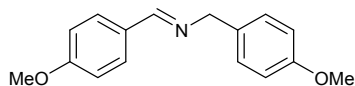

**N-(2-methylbenzylidene)-1-(o-tolyl)methanamine (5c):** Yellow oil.  $^1\text{H}$  NMR (500 MHz,  $\text{CDCl}_3$ )  $\delta$  8.72 (s, 1H), 7.98 (d,  $J = 7.5$  Hz, 1H), 7.34 (d,  $J = 7.1$  Hz, 3H), 7.29 (d,  $J = 6.5$  Hz, 1H), 7.21 (d,  $J = 4.6$  Hz, 3H), 4.87 (s, 2H), 2.55 (s, 3H), 2.44 (s, 3H). Data in accordance with that previously published<sup>6-11</sup>.

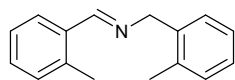

**N-(4-methoxybenzyl)-1-(4-methoxyphenyl)methanimine (5d):** Yellow oil.  $^1\text{H}$  NMR (500 MHz,  $\text{CDCl}_3$ )  $\delta$  8.28 (s, 1H), 7.70 (d,  $J = 8.7$  Hz, 2H), 7.23 – 7.19 (m, 1H), 6.96 – 6.79 (m, 5H), 4.71 (s, 2H), 3.81 (s, 3H), 3.77 (s, 3H). Data in accordance with that previously published<sup>6-11</sup>.

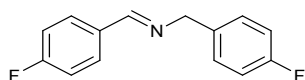

**1-phenyl-N-(1-phenylethyl)ethan-1-imine (5e):** Yellow oil.  $^1\text{H}$  NMR (500 MHz,  $\text{CDCl}_3$ )  $\delta$  7.76 (dd,  $J = 6.7, 3.0$  Hz, 2H), 7.31 – 7.29 (m, 3H), 7.19 – 7.12 (m, 5H), 4.76 (q,  $J = 6.6$  Hz, 1H), 2.19 (d,  $J = 5.8$  Hz, 3H), 1.47 (d,  $J = 6.6$  Hz, 3H). Data in accordance with that previously published<sup>6-11</sup>.

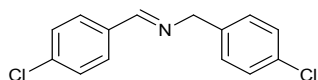

**N-(4-fluorobenzyl)-1-(4-fluorophenyl)methanimine (5f):** Yellow oil.  $^1\text{H}$  NMR (501 MHz,  $\text{CDCl}_3$ )  $\delta$  8.27 (s, 1H), 7.70 (dd,  $J = 8.5, 5.6$  Hz, 2H), 7.22 (dd,  $J = 8.6, 5.7$  Hz, 2H), 7.03 (t,  $J = 8.6$  Hz, 2H), 6.96 – 6.92 (m, 2H), 4.69 (s, 2H). Data in accordance with that previously published<sup>6-11</sup>.

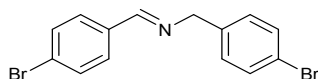

**N-(3-fluorobenzyl)-1-(3-fluorophenyl)methanimine (5g):** Yellow oil.  $^1\text{H}$  NMR (500 MHz,  $\text{CDCl}_3$ )  $\delta$  8.38 (s, 1H), 7.59 – 7.52 (m, 2H), 7.41 (dt,  $J = 13.5, 6.8$  Hz, 1H), 7.35 – 7.30 (m, 2H), 7.04 (s, 1H), 6.96 (td,  $J = 8.3, 4.3$  Hz, 2H), 4.83 (s, 2H). Data in accordance with that previously published<sup>6-11</sup>.

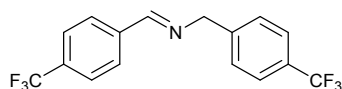

**N-(4-chlorobenzylidene)-1-(4-chlorophenyl)methanamine (5h):** White solid.  $^1\text{H}$  NMR (500 MHz,  $\text{CDCl}_3$ )  $\delta$  8.37 (s, 1H), 7.79 (dd,  $J = 8.5, 5.6$  Hz, 2H), 7.32 (dd,  $J = 8.6, 5.7$  Hz, 2H), 7.12 (t,  $J = 8.6$  Hz, 2H), 7.05 – 7.02 (m, 2H), 4.79 (s, 2H). Data in accordance with that previously published<sup>6-11</sup>.

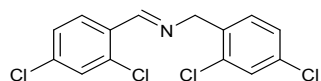

**N-(2, 4-dichlorobenzyl)-1-(2,4-dichlorophenyl)methanimine (5i):** Yellow oil.  $^1\text{H}$  NMR (500 MHz,  $\text{CDCl}_3$ )  $\delta$  8.79 (s, 1H), 8.05 (d,  $J = 8.5$  Hz, 1H), 7.41 (dd,  $J = 3.8, 2.1$  Hz, 2H), 7.36 (d,  $J = 2.2$  Hz, 1H), 7.30 (d,  $J = 3.9$  Hz, 1H), 7.23 (d,  $J = 1.8$  Hz, 1H), 4.87 (s, 2H). Data in accordance with that previously published<sup>6-11</sup>.

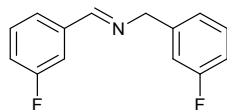

**N-(4-bromobenzyl)-1-(4-bromophenyl)methanimine (5j):** White solid.  $^1\text{H}$  NMR (500 MHz,  $\text{CDCl}_3$ )  $\delta$  8.33 (s, 1H), 7.64 (d,  $J = 8.4$  Hz, 2H), 7.55 (d,  $J = 8.4$  Hz, 2H), 7.46 (t,  $J = 8.5$  Hz, 4H), 4.74 (s, 2H). Data in accordance with that previously published<sup>6-11</sup>.

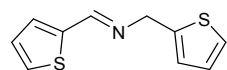

**N-(4-(trifluoromethyl)benzyl)-1-(4-(trifluoromethyl)phenyl)methanimine (5K):** Yellow oil.  $^1\text{H}$  NMR (500 MHz,  $\text{CDCl}_3$ )  $\delta$  8.40 (s, 1H), 7.84 (d,  $J = 8.1$  Hz, 2H), 7.62 (d,  $J = 8.1$  Hz, 2H), 7.54 (s, 2H), 7.39 (d,  $J = 6.9$  Hz, 2H), 4.83 (s, 2H). Data in accordance with that previously published<sup>6-11</sup>.

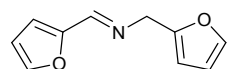

**1-(thiophen-2-yl)-N-(thiophen-2-ylmethyl)methanimine (5l):** Yellow oil.  $^1\text{H}$  NMR (500 MHz,  $\text{CDCl}_3$ )  $\delta$  8.04 (s, 1H), 7.44 (s, 1H), 7.30 (t,  $J = 8.5$  Hz, 1H), 6.72 (d,  $J = 3.3$  Hz, 1H), 6.40 (dd,  $J = 3.3, 1.7$  Hz, 1H), 6.28 – 6.24 (m, 1H), 6.20 (d,  $J = 3.0$  Hz, 1H), 4.68 (s, 2H). Data in accordance with that previously published<sup>6-11</sup>.

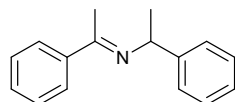

**1-(furan-2-yl)-N-(furan-2-ylmethyl)methanimine (5m):** Yellow oil.  $^1\text{H}$  NMR (500 MHz,  $\text{CDCl}_3$ )  $\delta$  8.05 (s, 1H), 7.44 (d,  $J = 7.8$  Hz, 1H), 7.31 (s, 1H), 6.72 (d,  $J = 3.3$  Hz, 1H), 6.41 (dd,  $J = 3.3, 1.7$  Hz, 1H), 6.28 – 6.24 (m, 1H), 6.23 – 6.16 (m, 1H), 4.69 (s, 2H). Data in accordance with that previously published<sup>6-11</sup>.

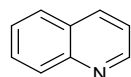

**Quinoline (5n):** Colourless oil.  $^1\text{H}$  NMR (500 MHz,  $\text{CDCl}_3$ )  $\delta$  8.73 (dd,  $J = 4.1, 1.5$  Hz, 1H), 7.99 (d,  $J = 8.5$  Hz, 1H), 7.84 (d,  $J = 8.3$  Hz, 1H), 7.58 – 7.45 (m, 2H), 7.29 (t,  $J = 7.5$  Hz, 1H), 7.09 (dd,  $J = 8.3, 4.2$  Hz, 1H). Data in accordance with that previously published<sup>6-11</sup>.

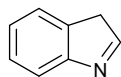

**3H-indole (5o):** white solid.  $^1\text{H}$  NMR (500 MHz,  $\text{CDCl}_3$ )  $\delta$  8.07 (s, 1H), 7.74 (d,  $J$  = 7.9 Hz, 1H), 7.43 (d,  $J$  = 8.1 Hz, 1H), 7.30 – 7.14 (m, 3H), 6.63 (s, 1H). Data in accordance with that previously published<sup>6-11</sup>.

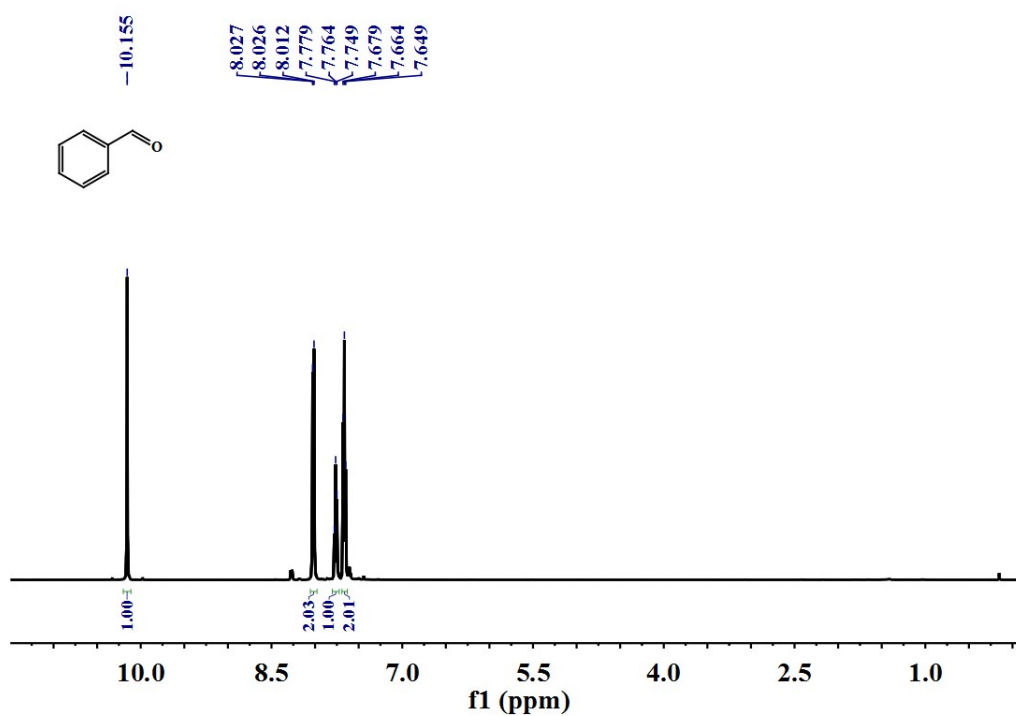

$^1\text{H}$  NMR spectra of 3a (500 MHz,  $\text{CDCl}_3$ )

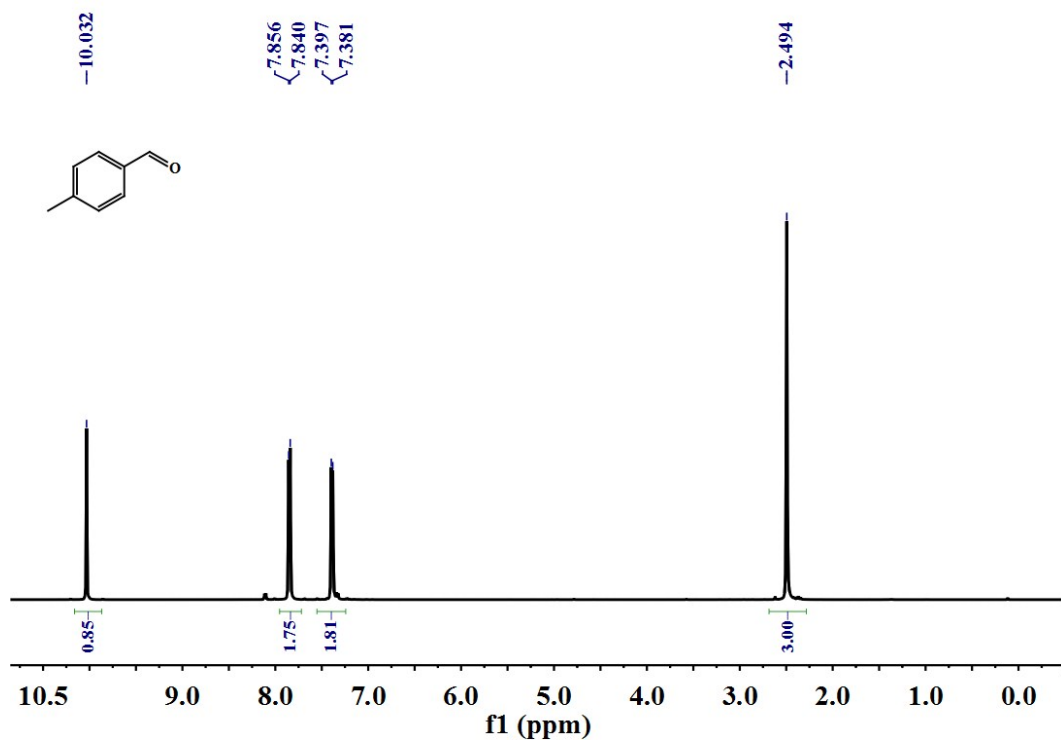

$^1\text{H}$  NMR spectra of 3b (500 MHz,  $\text{CDCl}_3$ )

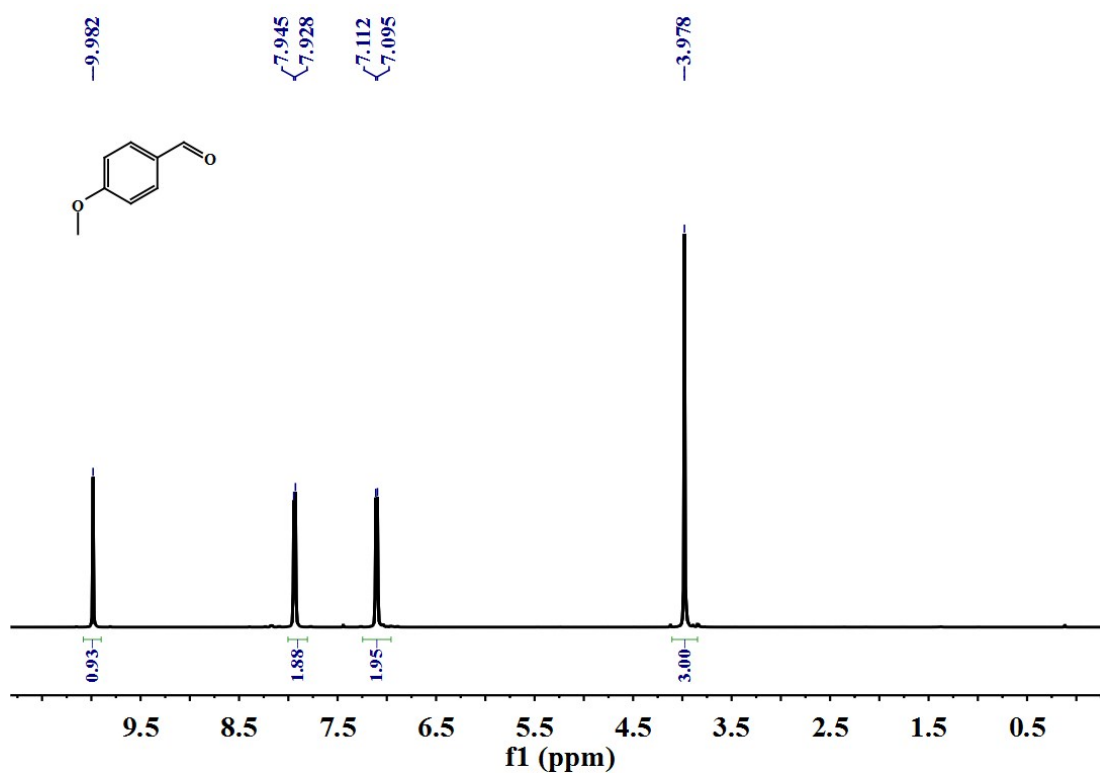

$^1\text{H}$  NMR spectra of 3c (500 MHz,  $\text{CDCl}_3$ )



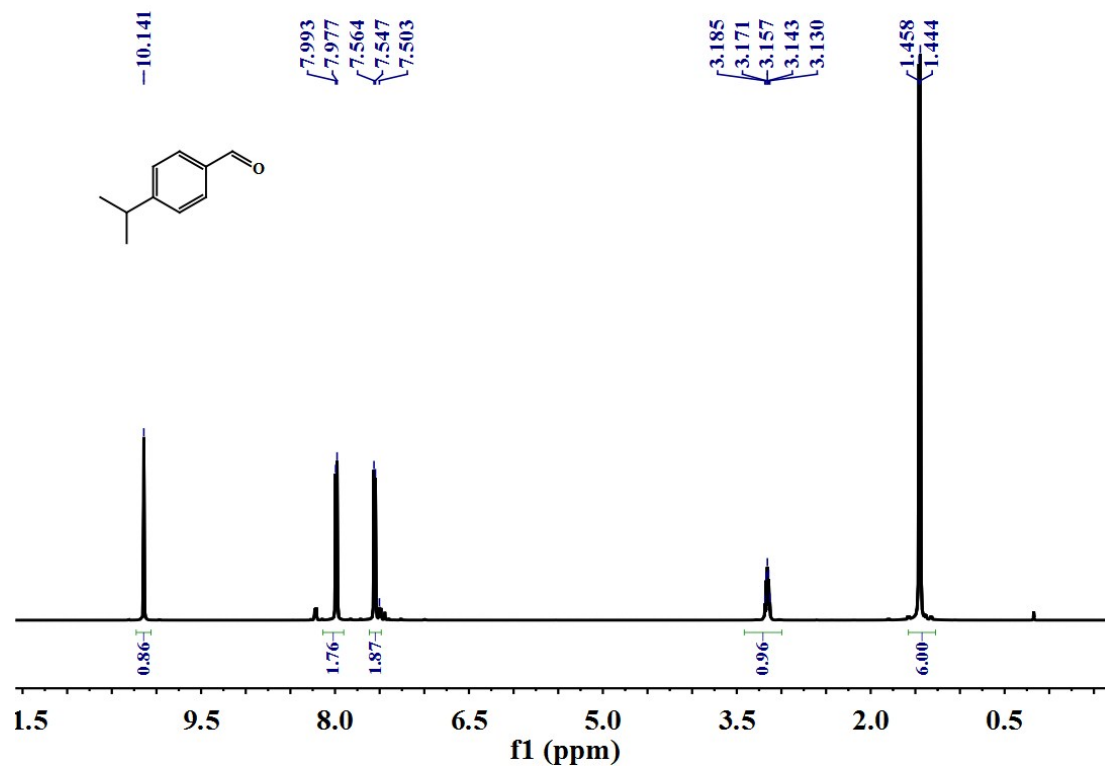

<sup>1</sup>H NMR spectra of 3d (500 MHz, CDCl<sub>3</sub>)

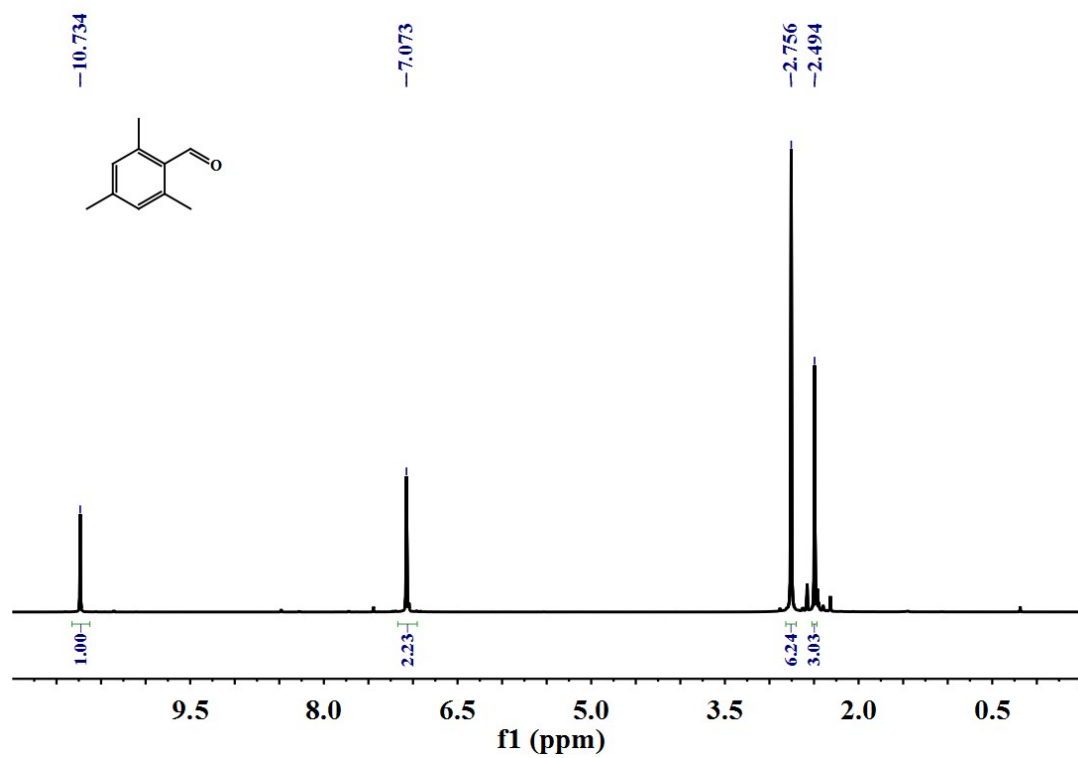

<sup>1</sup>H NMR spectra of 3e (500 MHz, CDCl<sub>3</sub>)

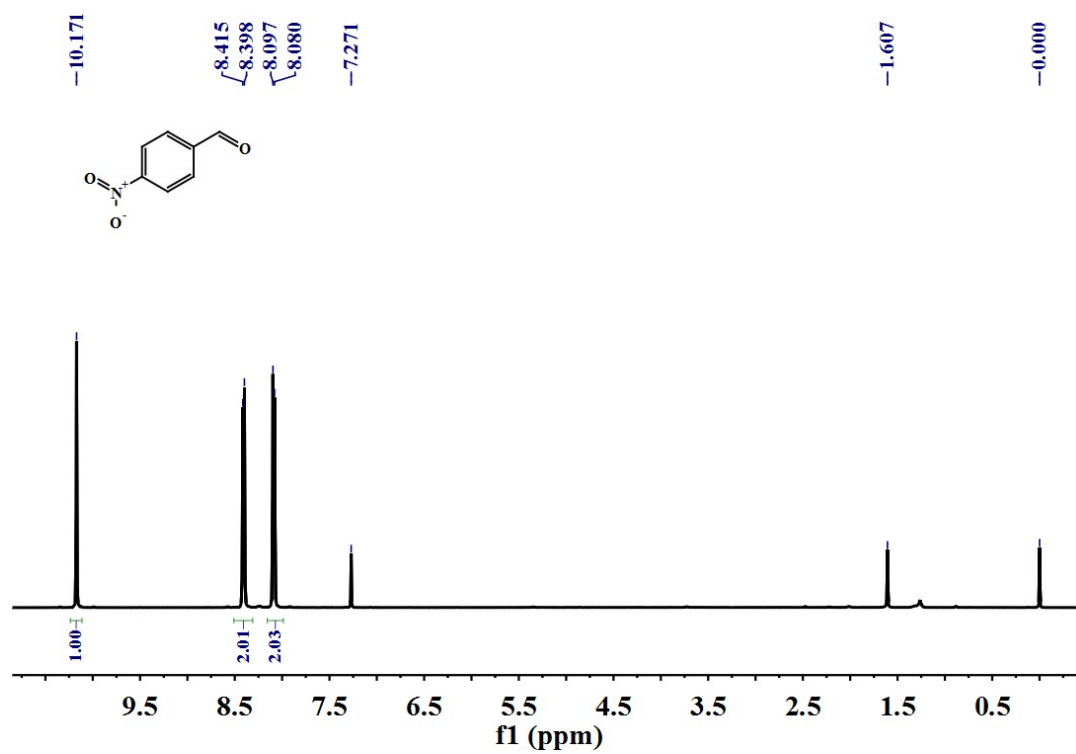

<sup>1</sup>H NMR spectra of 3f (500 MHz, CDCl<sub>3</sub>)

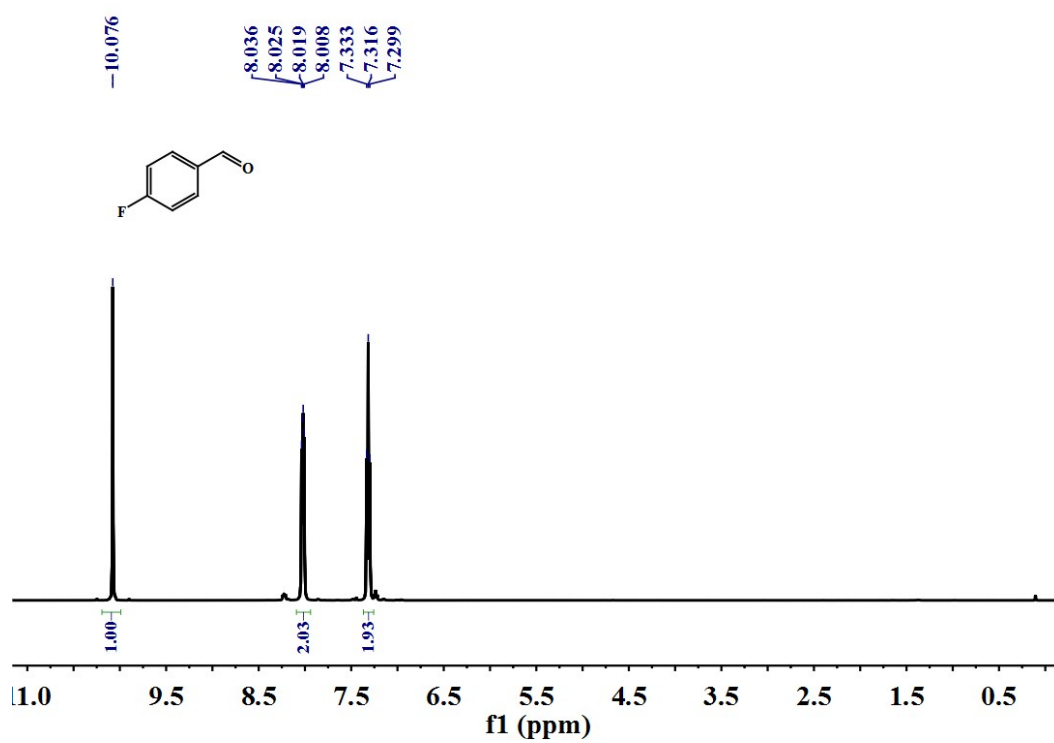

<sup>1</sup>H NMR spectra of 3g (500 MHz, CDCl<sub>3</sub>)

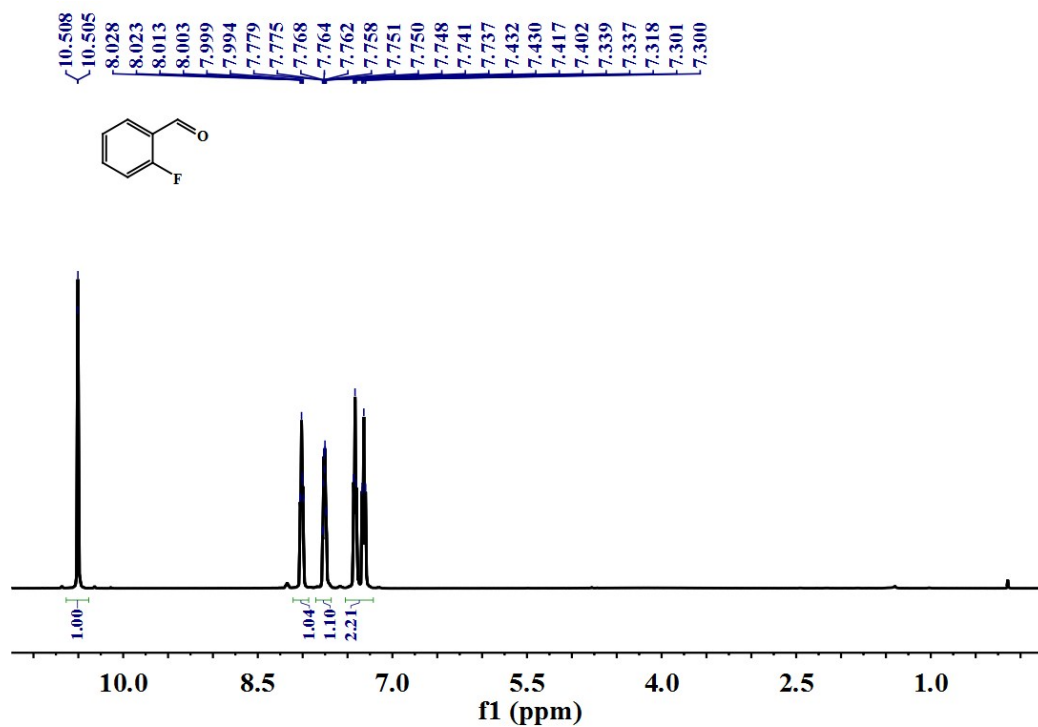

<sup>1</sup>H NMR spectra of 3h (500 MHz, CDCl<sub>3</sub>)

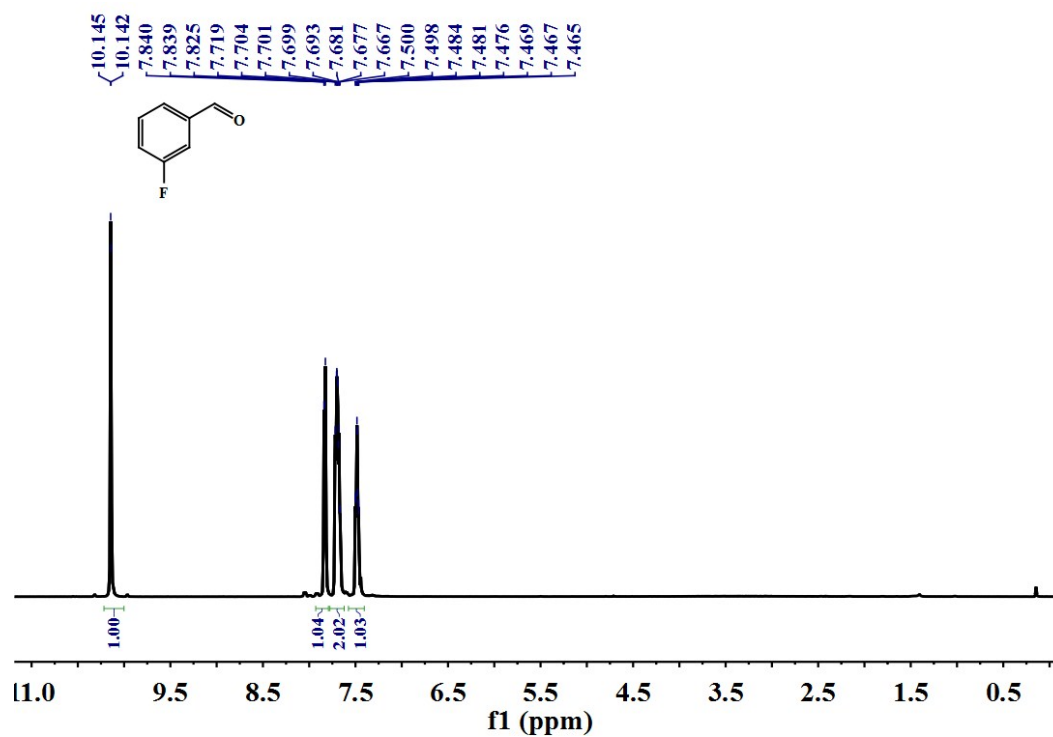

<sup>1</sup>H NMR spectra of 3i (500 MHz, CDCl<sub>3</sub>)

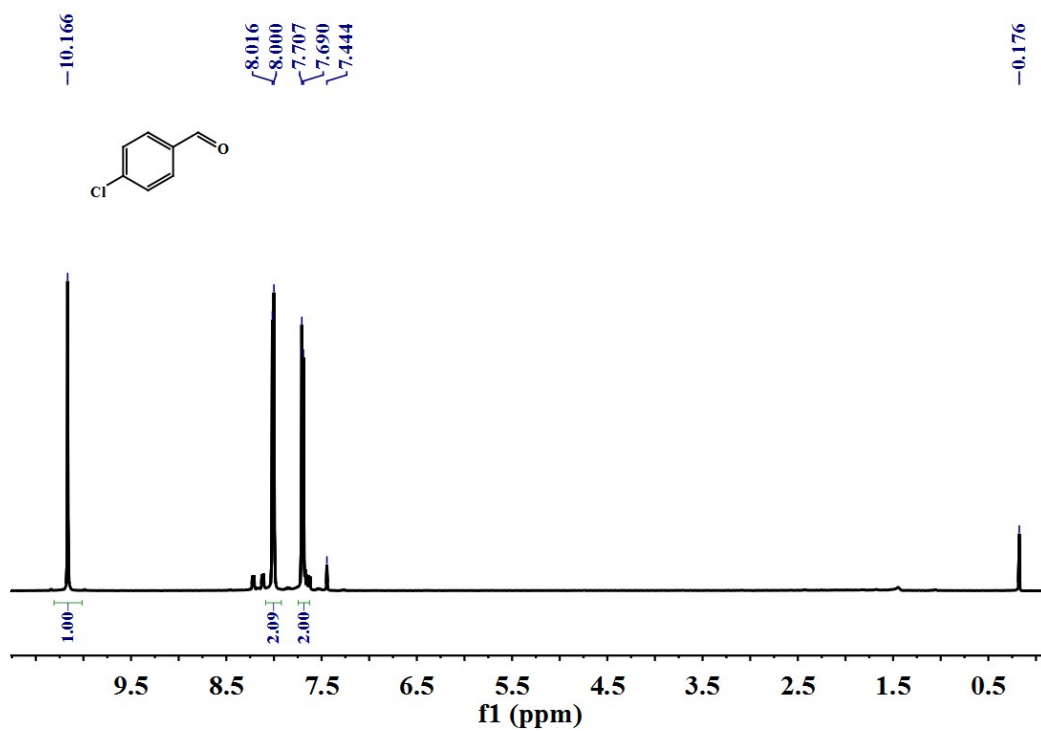

$^1\text{H}$  NMR spectra of **3j** (500 MHz,  $\text{CDCl}_3$ )

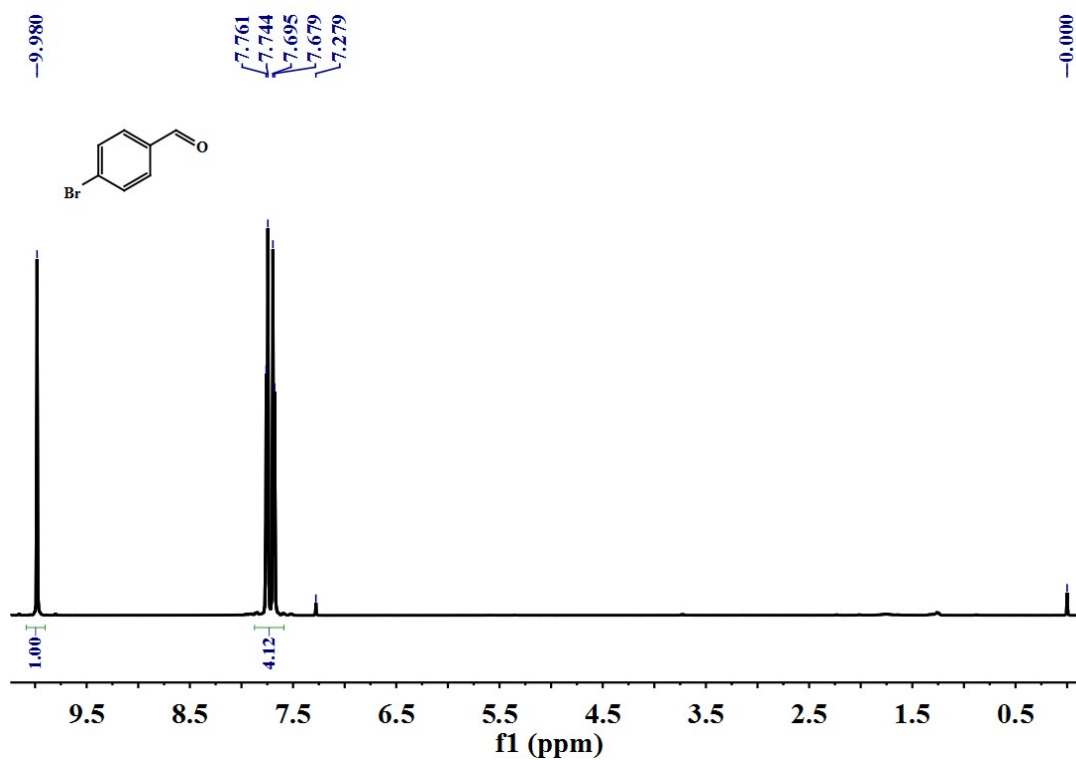

$^1\text{H}$  NMR spectra of **3k** (500 MHz,  $\text{CDCl}_3$ )

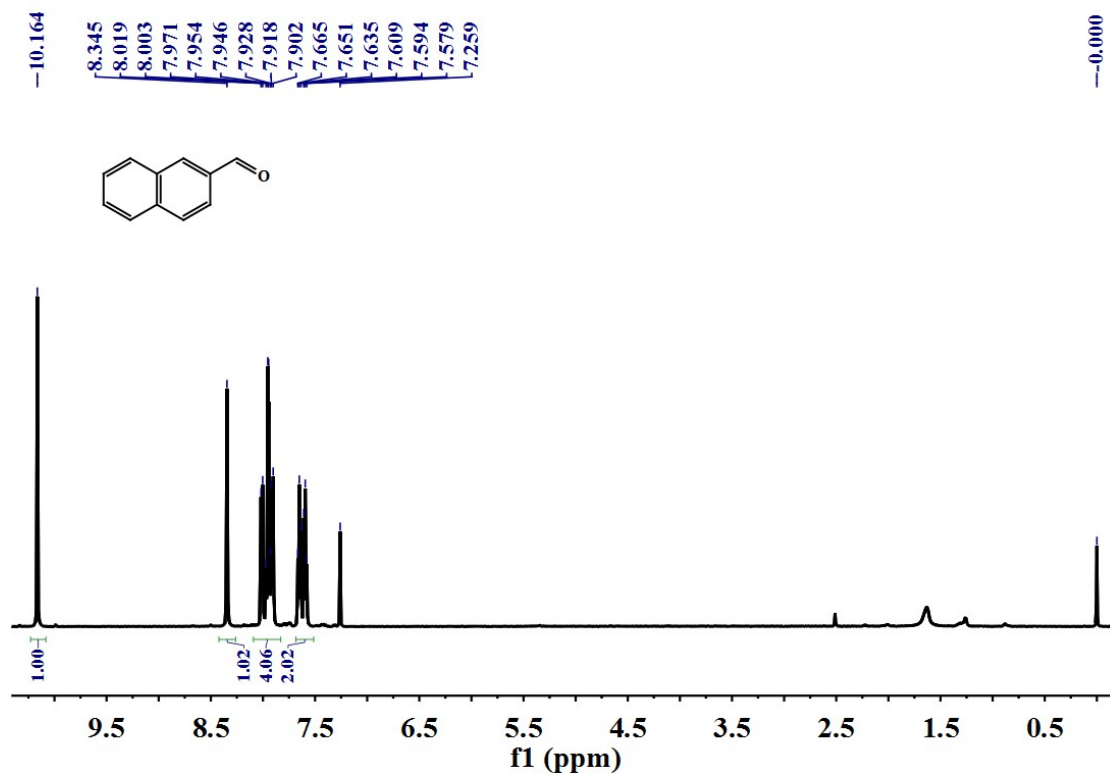

<sup>1</sup>H NMR spectra of 3l (500 MHz, CDCl<sub>3</sub>)

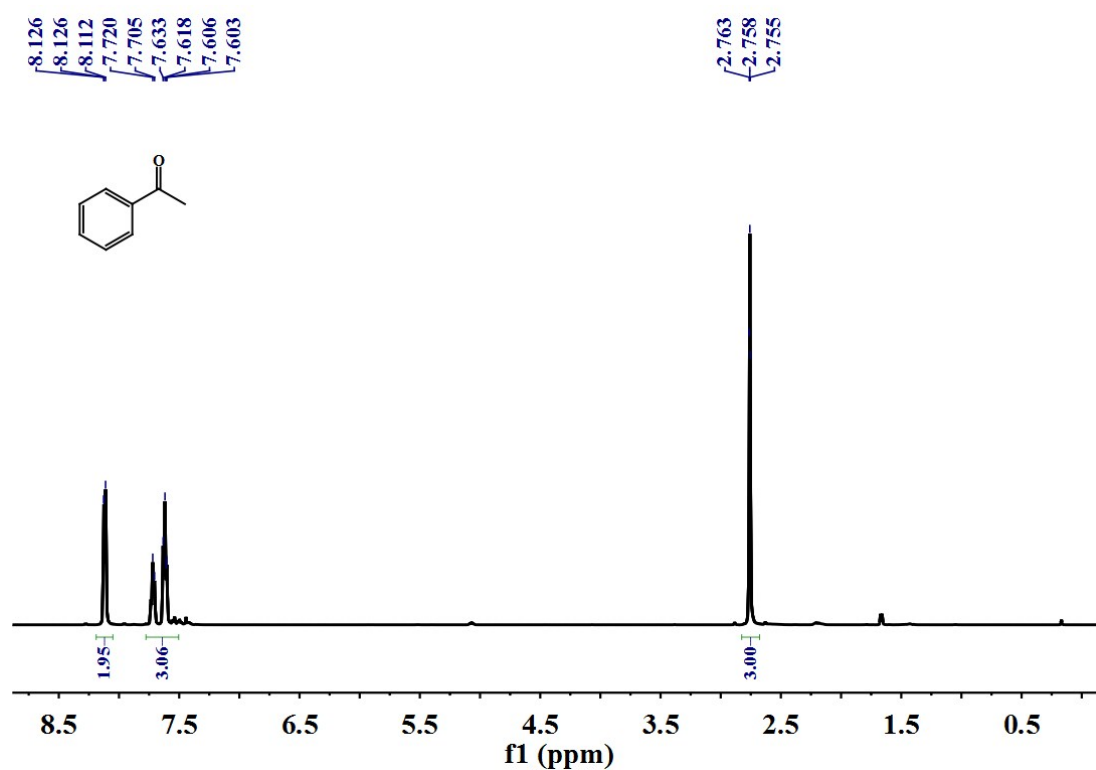

<sup>1</sup>H NMR spectra of 3n (500 MHz, CDCl<sub>3</sub>)

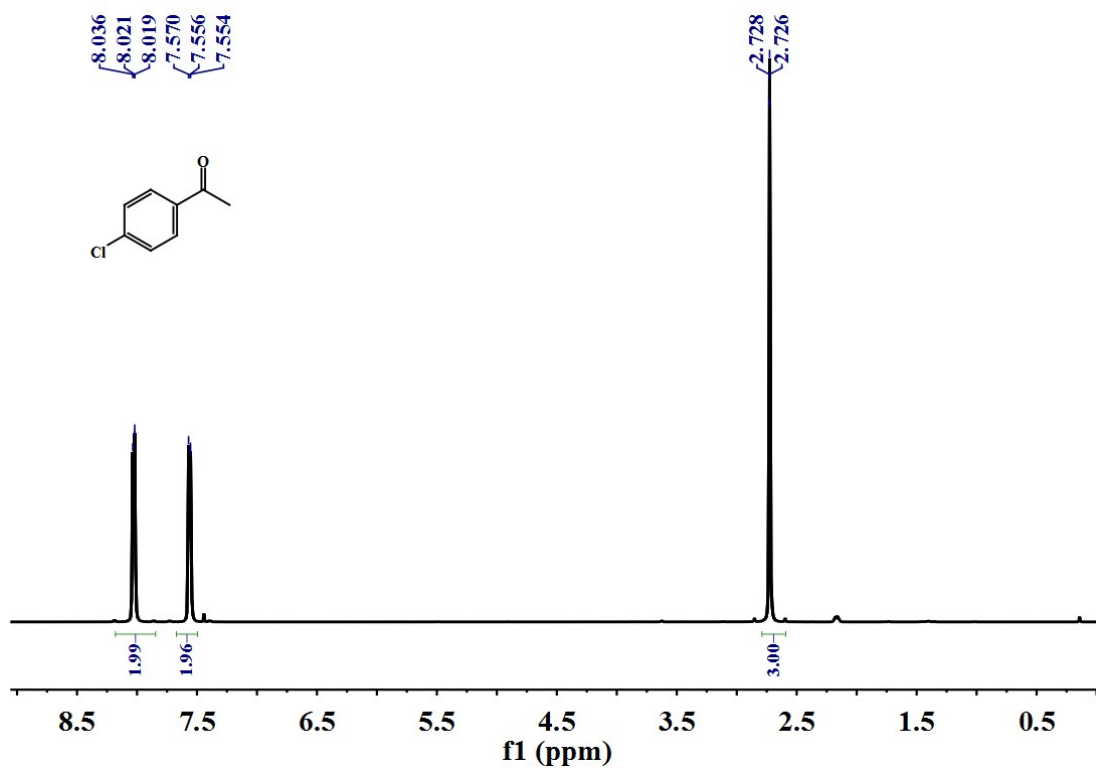

<sup>1</sup>H NMR spectra of 3o (500 MHz, CDCl<sub>3</sub>)

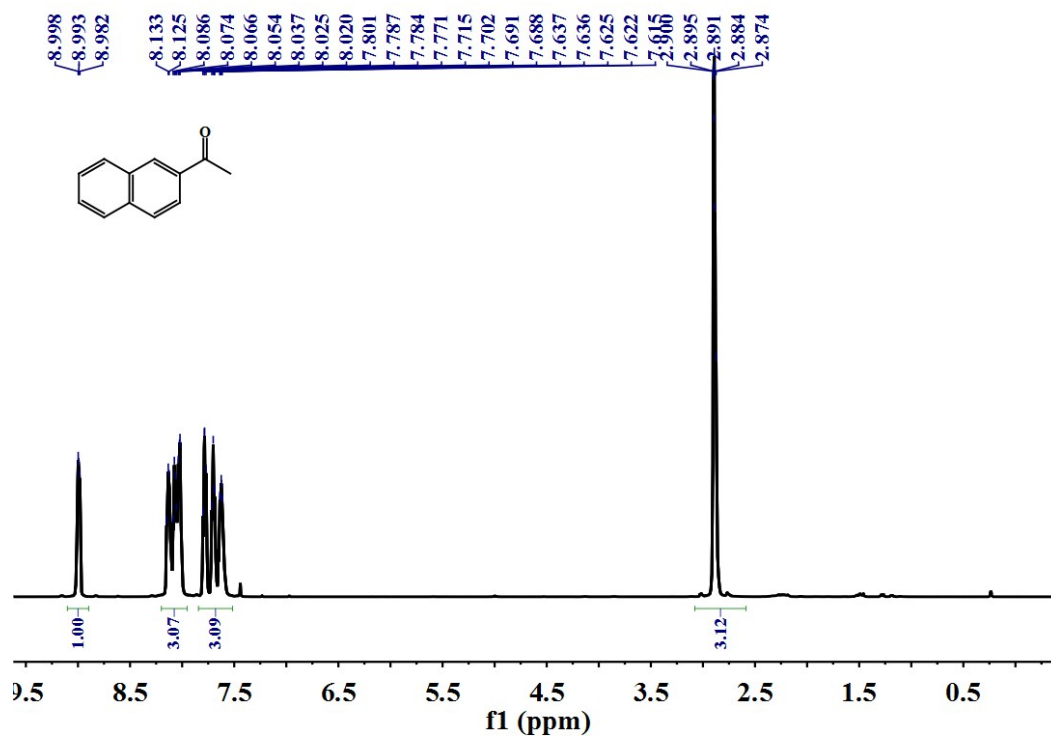

<sup>1</sup>H NMR spectra of 3p (500 MHz, CDCl<sub>3</sub>)

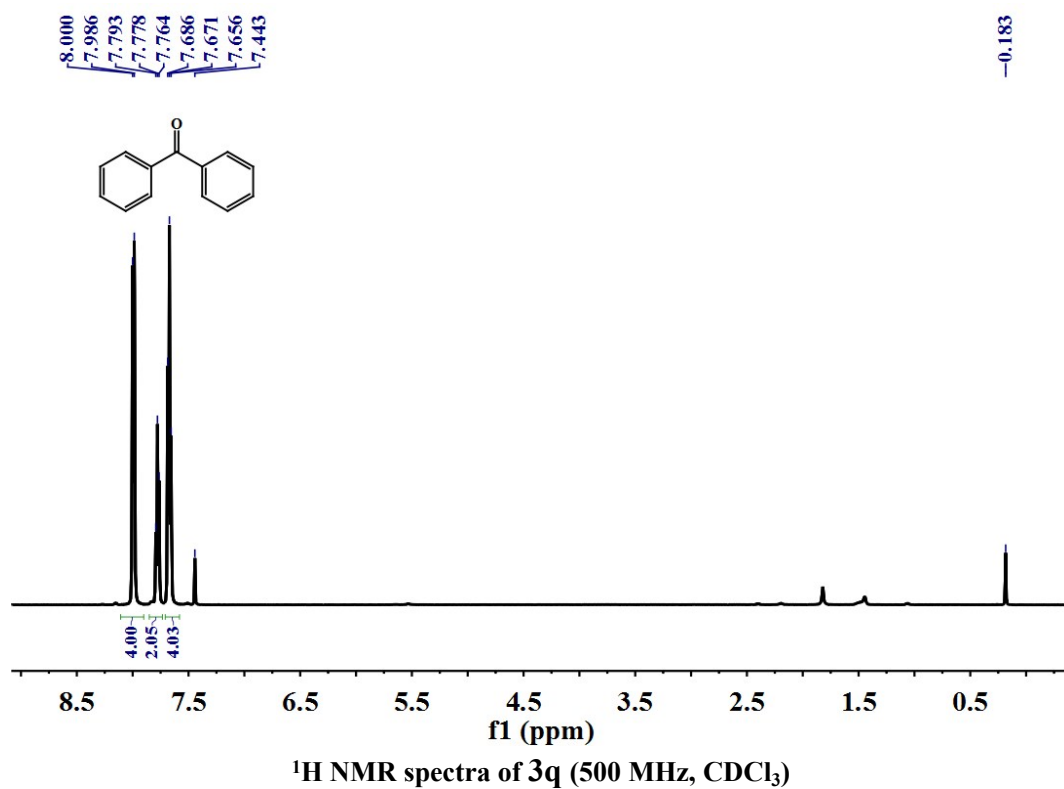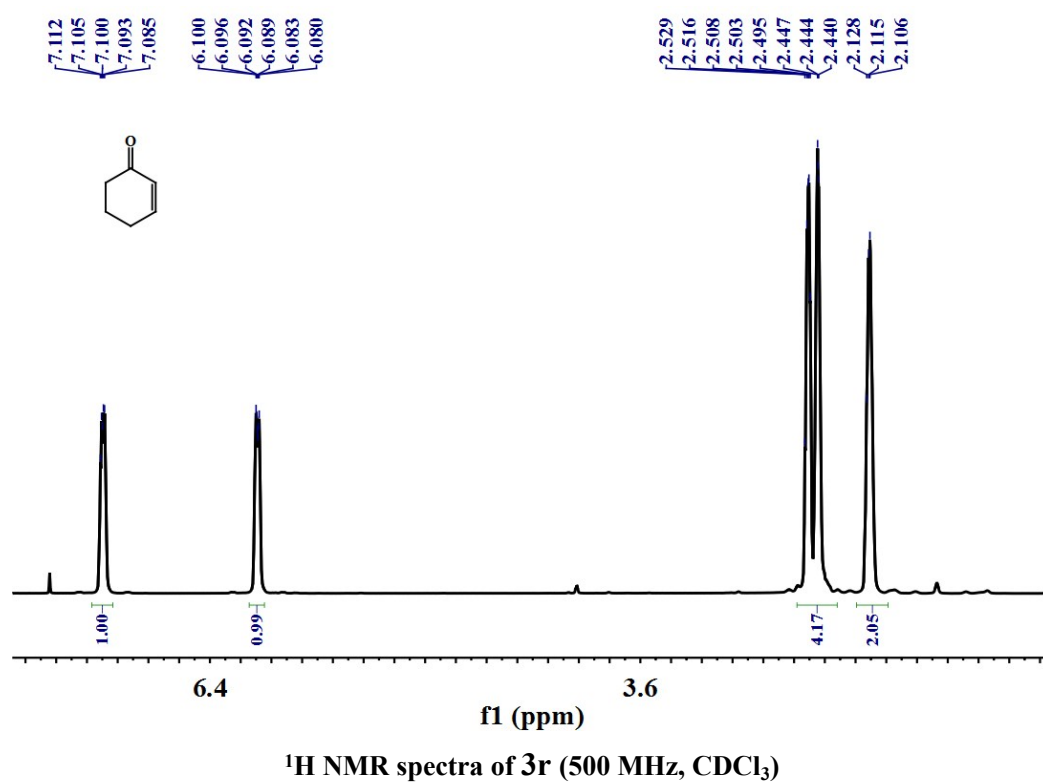

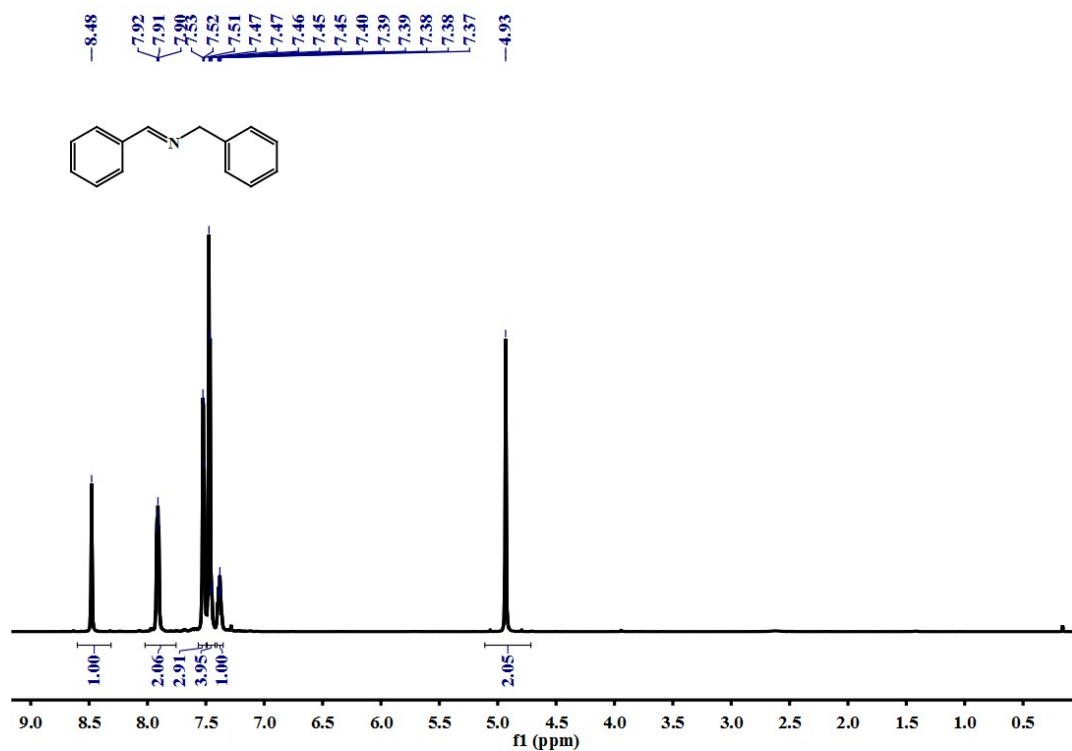

<sup>1</sup>H NMR spectra of 5a (500 MHz, CDCl<sub>3</sub>)

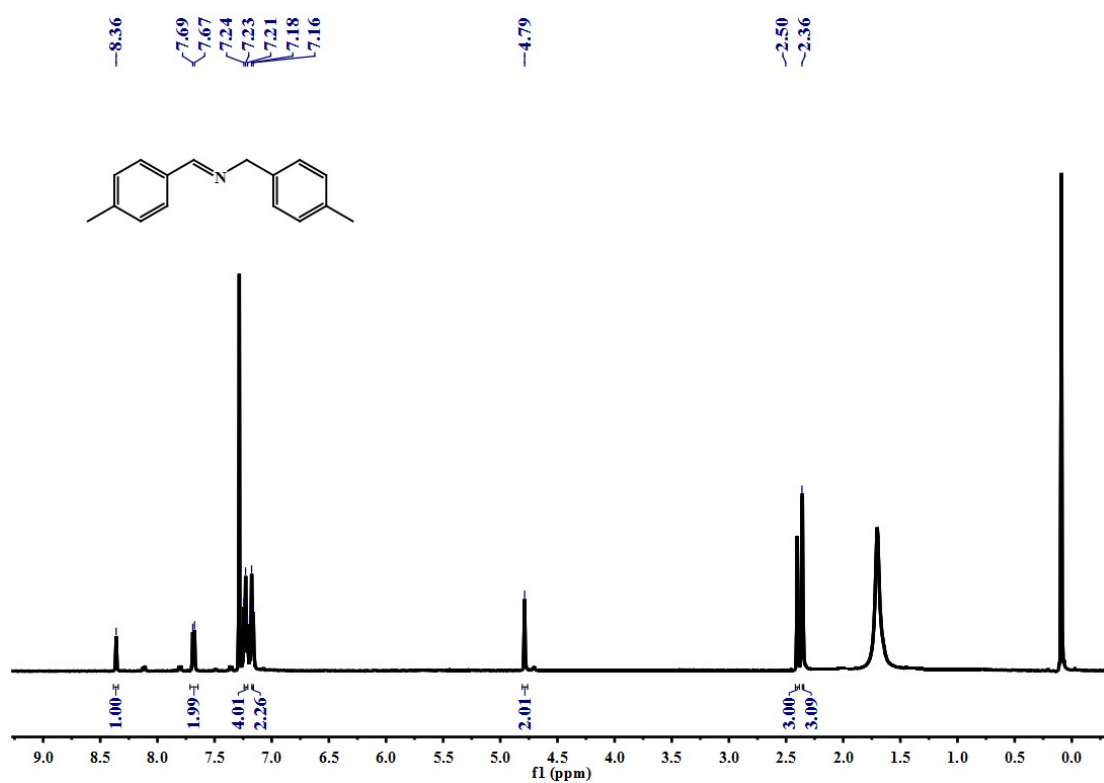

<sup>1</sup>H NMR spectra of 5b (500 MHz, CDCl<sub>3</sub>)



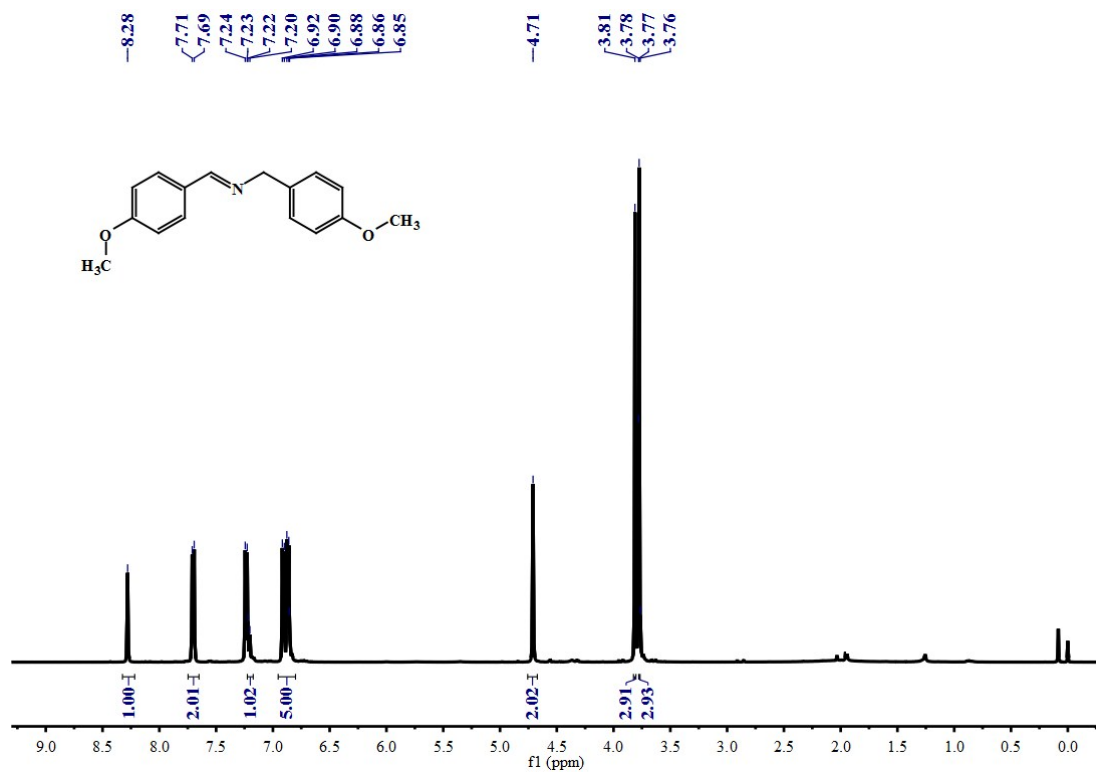

<sup>1</sup>H NMR spectra of 5c (500 MHz, CDCl<sub>3</sub>)

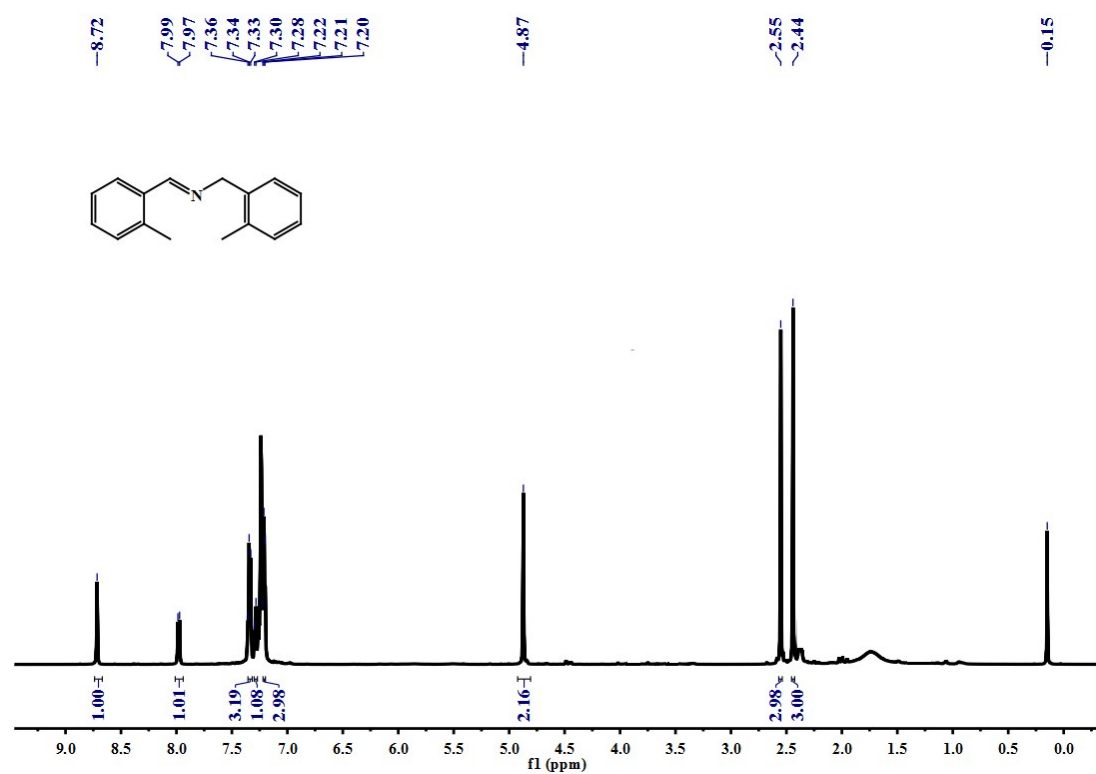

<sup>1</sup>H NMR spectra of 5d (500 MHz, CDCl<sub>3</sub>)

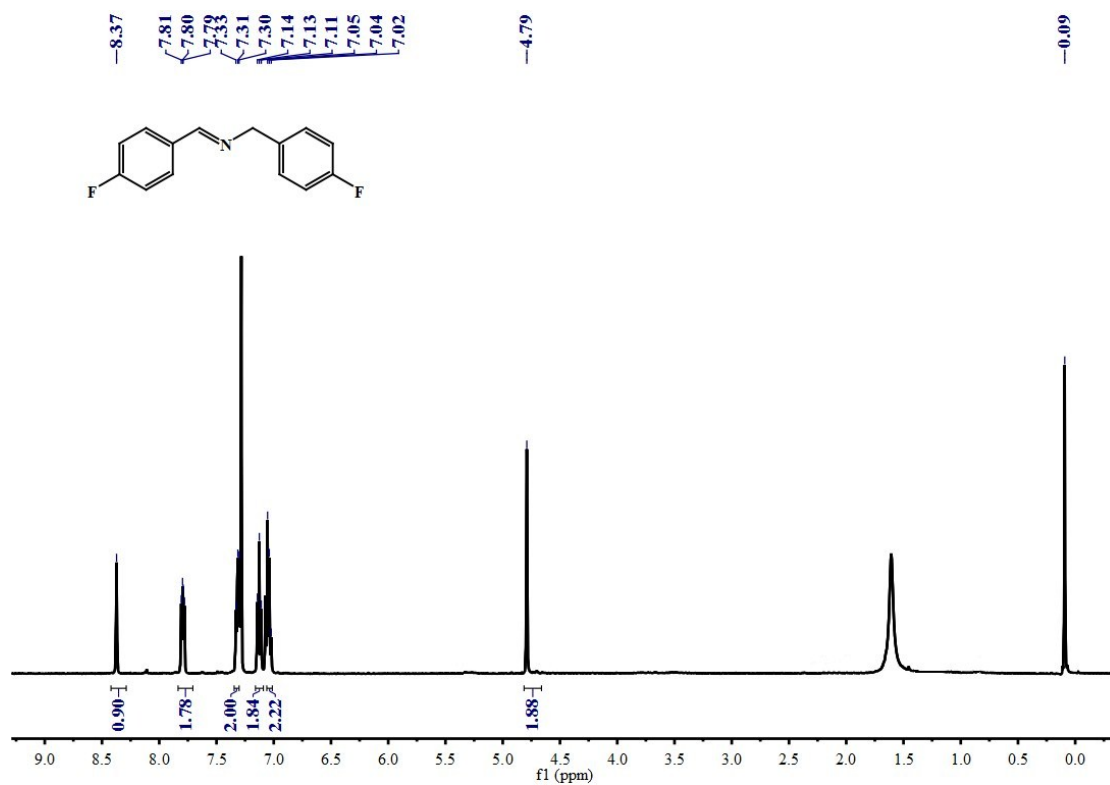

<sup>1</sup>H NMR spectra of **5e** (500 MHz, CDCl<sub>3</sub>)

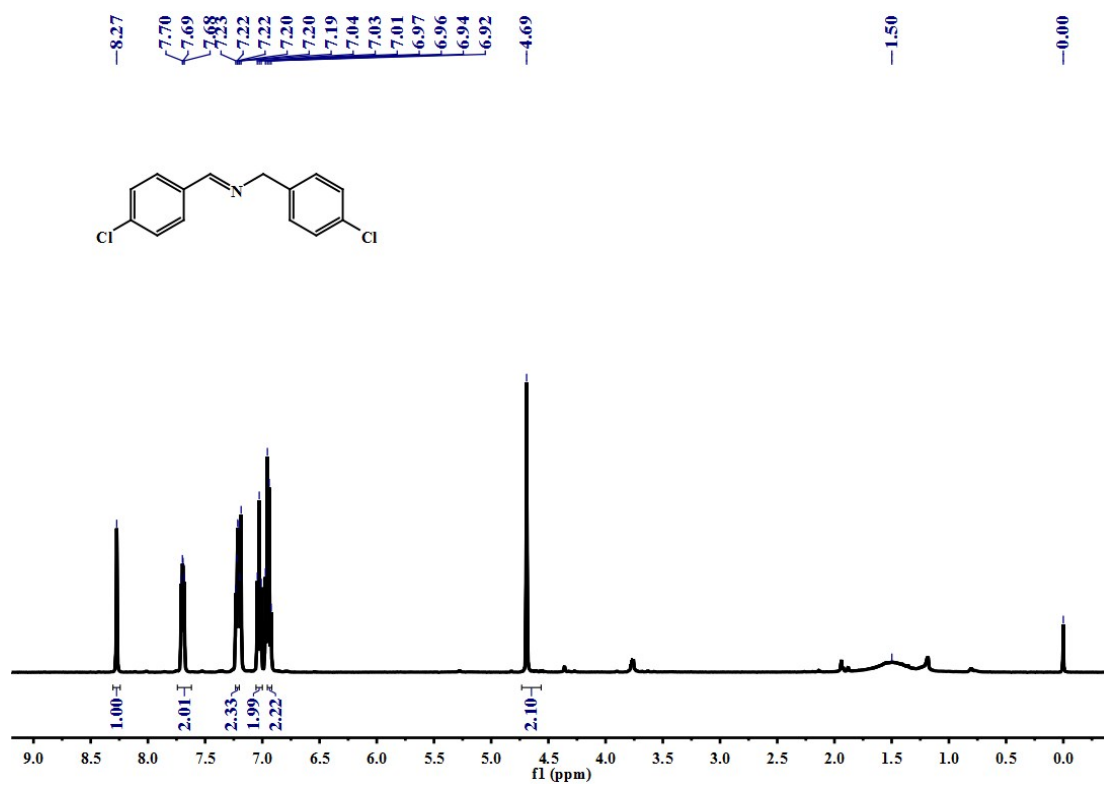

<sup>1</sup>H NMR spectra of **5f** (500 MHz, CDCl<sub>3</sub>)

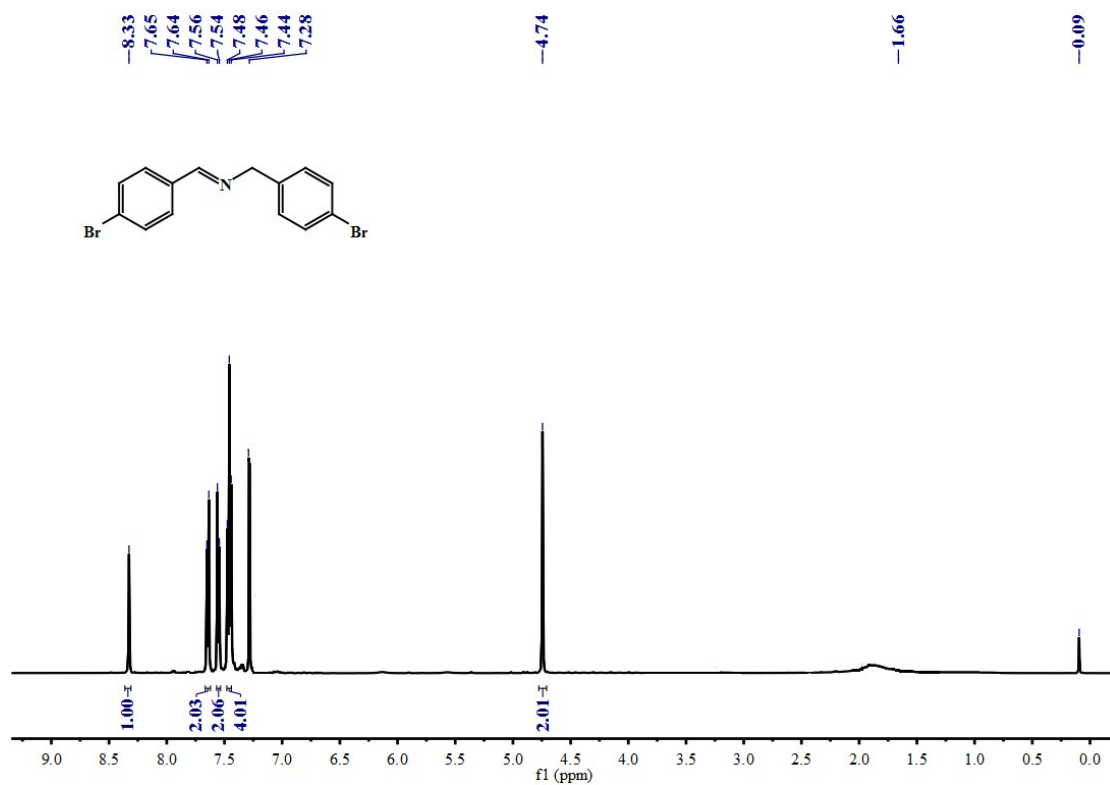

<sup>1</sup>H NMR spectra of **5g** (500 MHz, CDCl<sub>3</sub>)

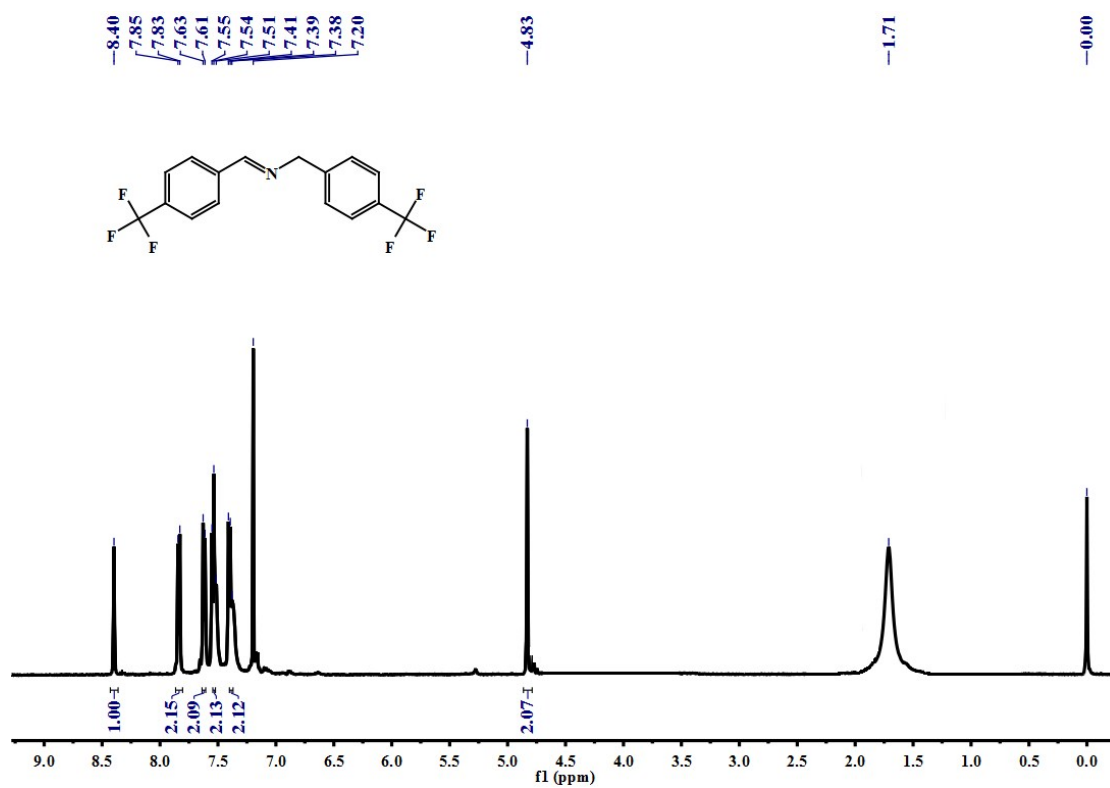

<sup>1</sup>H NMR spectra of **5h** (500 MHz, CDCl<sub>3</sub>)

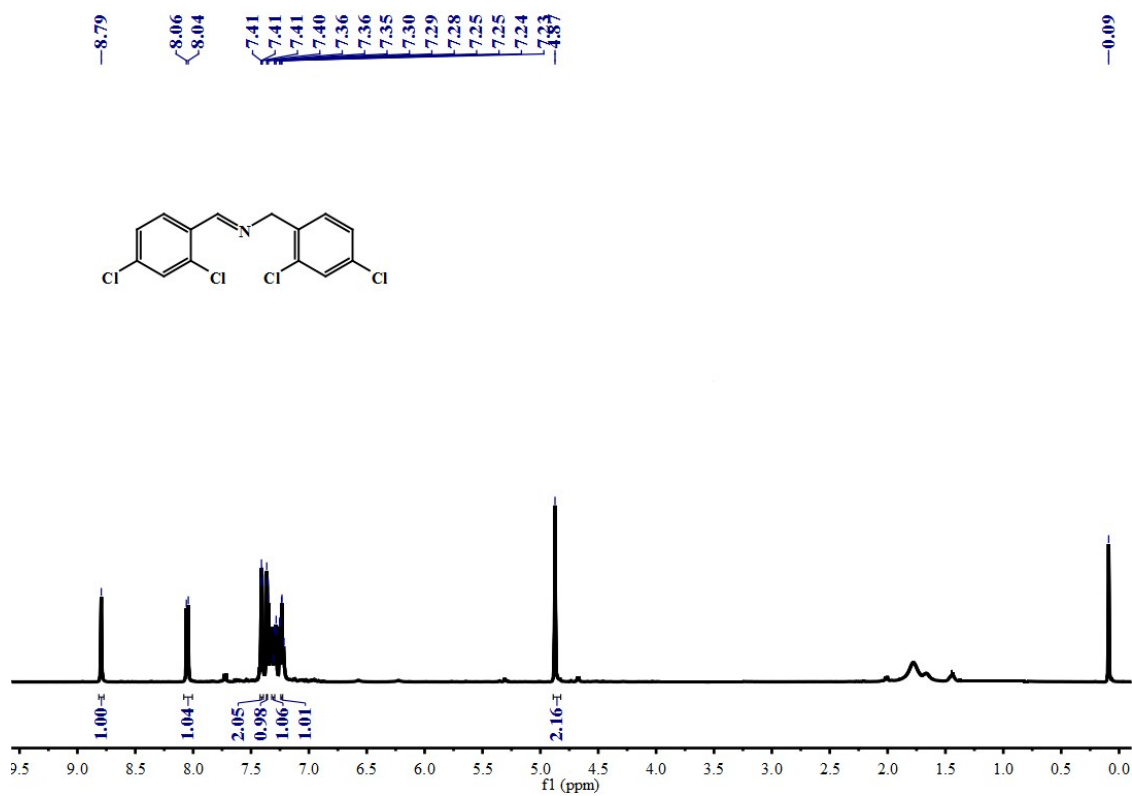

<sup>1</sup>H NMR spectra of **5i** (500 MHz, CDCl<sub>3</sub>)

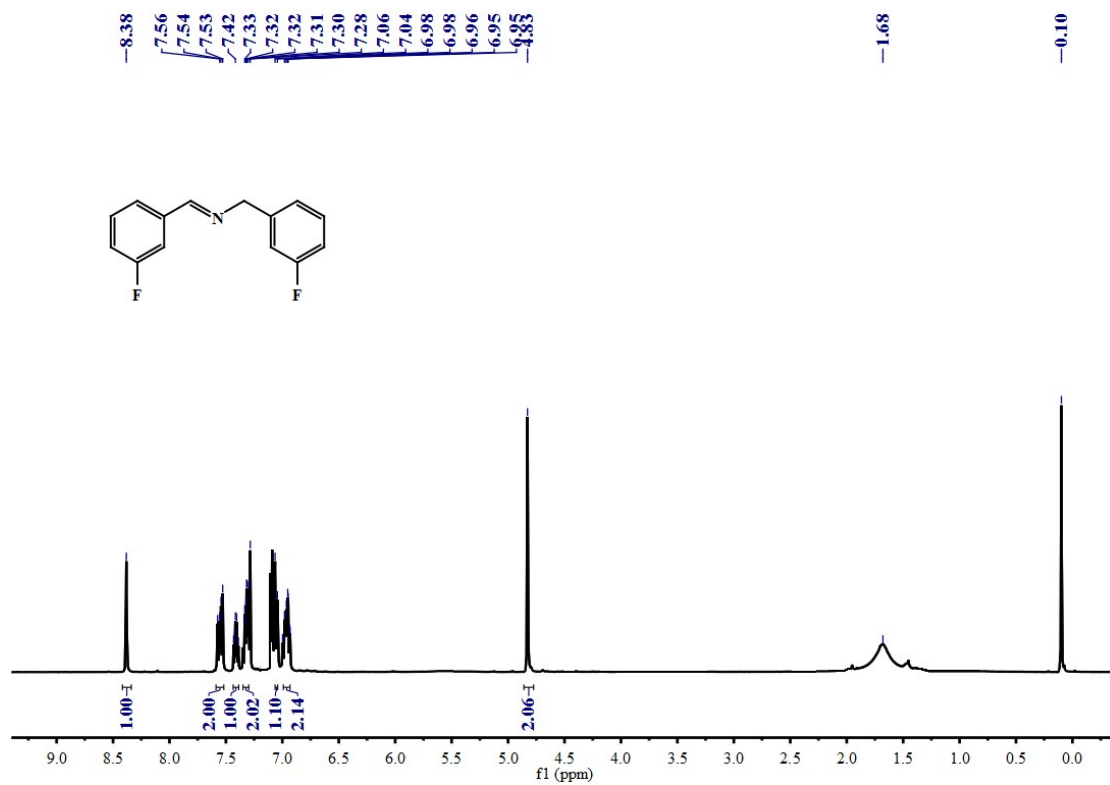

<sup>1</sup>H NMR spectra of **5j** (500 MHz, CDCl<sub>3</sub>)

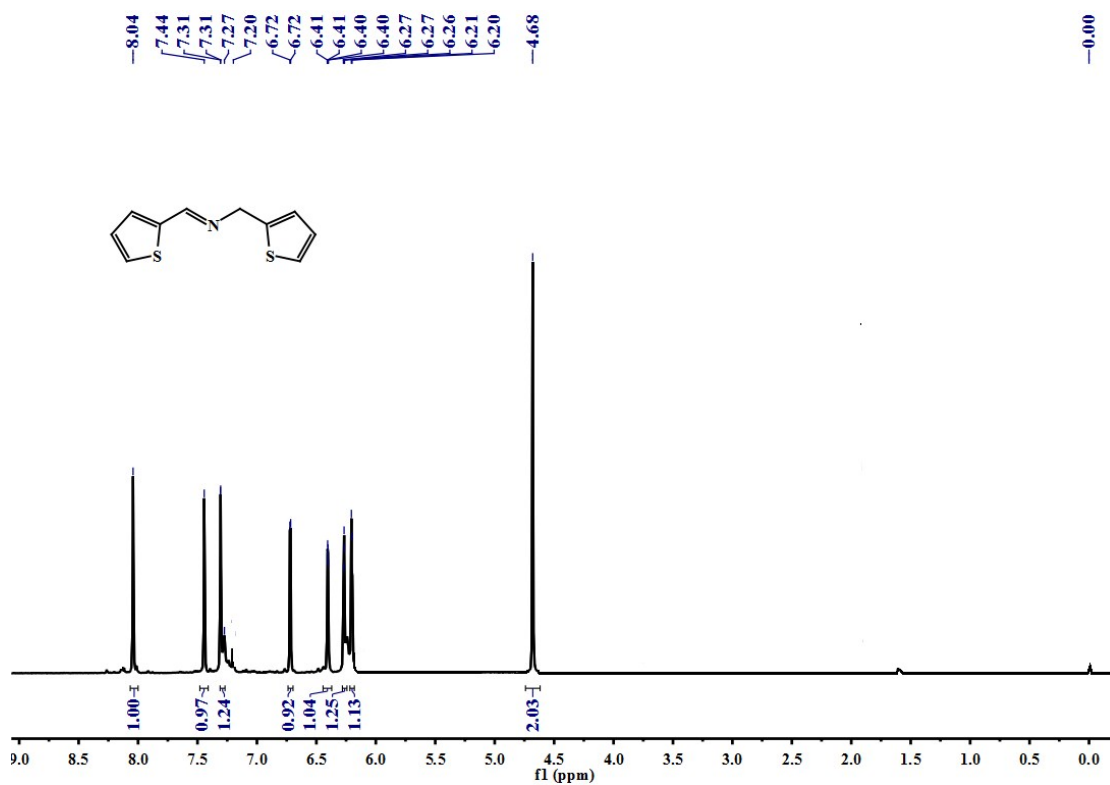

<sup>1</sup>H NMR spectra of 5k (500 MHz, CDCl<sub>3</sub>)

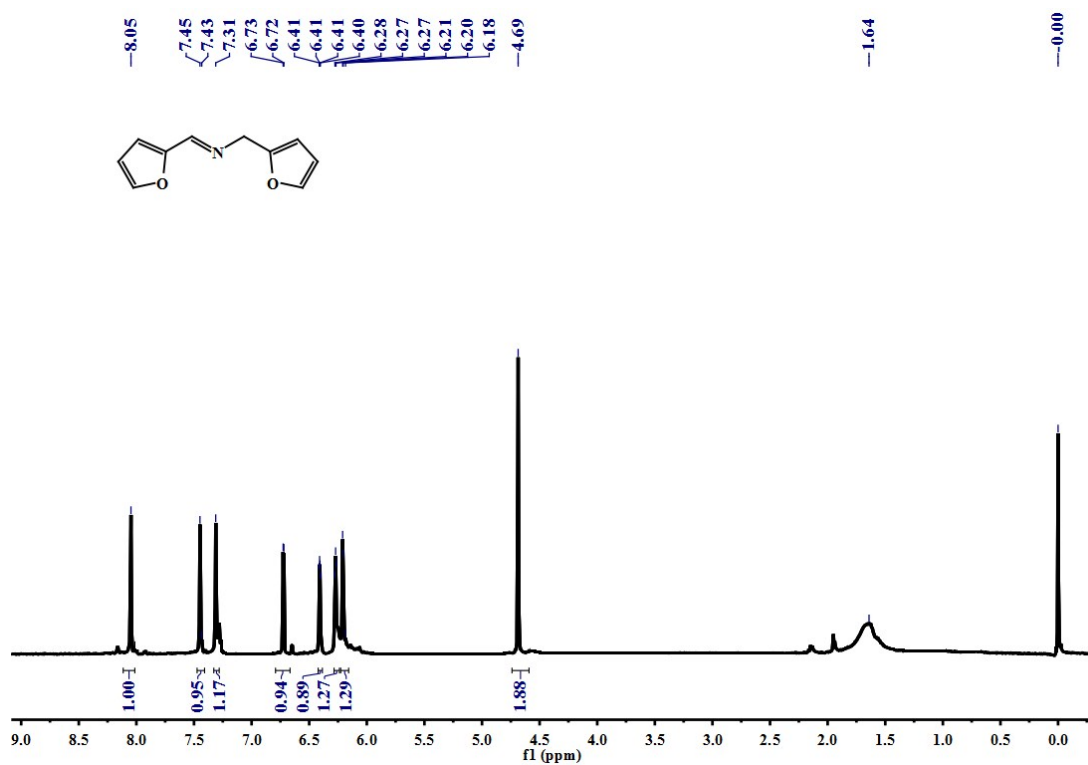

<sup>1</sup>H NMR spectra of 5l (500 MHz, CDCl<sub>3</sub>)

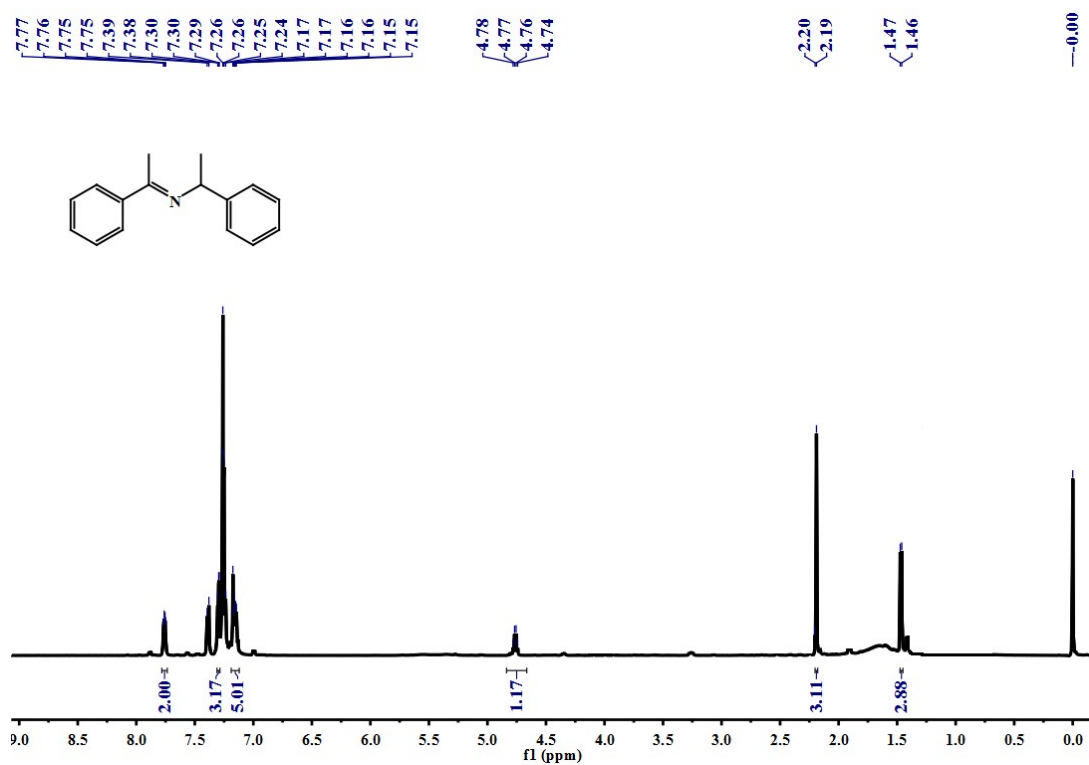

**<sup>1</sup>H NMR spectra of 5m (500 MHz, CDCl<sub>3</sub>)**

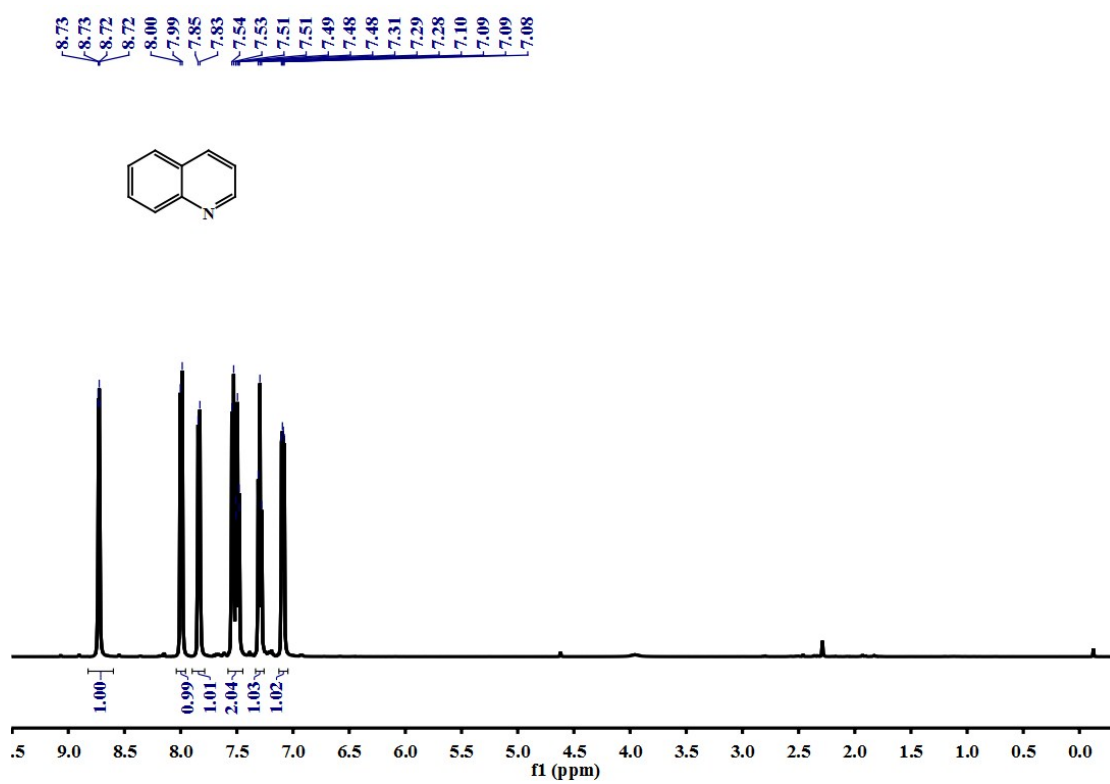

**<sup>1</sup>H NMR spectra of 5n (500 MHz, CDCl<sub>3</sub>)**

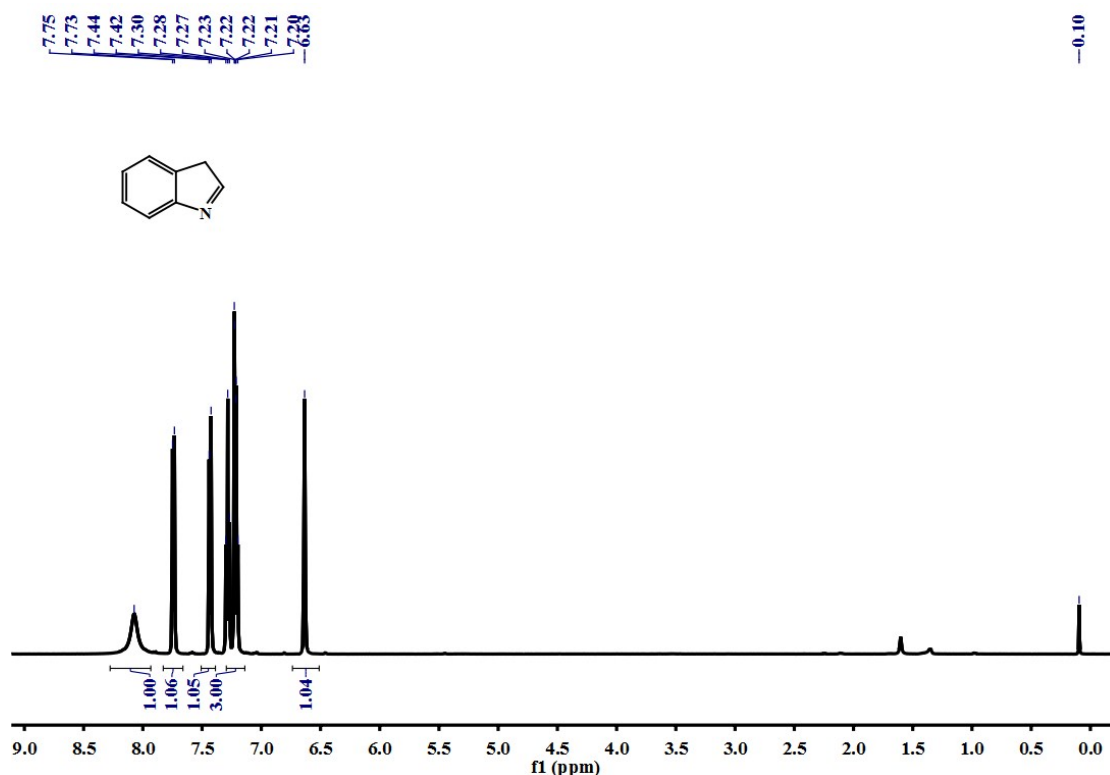

<sup>1</sup>H NMR spectra of **5o** (500 MHz, CDCl<sub>3</sub>)

## Reference

- 1 K. Nomiya, T. Takahashi, T. Shirai and M. Miwa, *Polyhedron*, 1987, **6**, 213-218.
- 2 F. Ito, T. Ozeki, H. Ichida, H. Miyamae and Y. Sasaki, *Acta Cryst.*, 1989, **45**, 946-947.
- 3 A. Blazevic, E. Al-Sayed, A. Roller, G. Giester and Rompel, A. *Chemistry*, 2015, **21**, 4762-4771.
- 4 H. Ai, Y. Wang, B. Li and L.-X. Wu, *Eur. J. Inorg. Chem.*, 2014, **17**, 2766-2772.
- 5 P.-F. Wu, P.-C. Yin, Z. Jin, H. Jian, Z.-C. Xiao and Wei, Y.-G. *Chemistry*, 2011, **17**, 12002-12005.
- 6 S. Biswas, B. Dutta, K. Mullick and C.-H. Kuo, *ACS Catal.*, 2015, **5**, 4394-4403.
- 7 B. Chen, S.-S. Shang, L.-Y. Wang, Y. Zhang and S. Gao, *Chem. Commun.*, 2016, **52**, 481-484.
- 8 W.-P. Deng, J.-S. Chen, J.-C. Kang, Q.-H. Zhang and Y. Wang, *Chem. Commun.*, 2016, **52**, 6805-6808.
- 9 A. Kumar, P. Kumar, C. Joshi, S. Ponnada, A. K. Pathak, A. B. Sreedhar Ali, and S. L. Jain, *Green Chem.*, 2016, **18**, 2514-2521.
- 10 M. Langeron, M. B. Fleury, *Angew. Chem. Int. Ed.*, 2012, **51**, 5409-5412.
- 11 K. Suzuki, F. Tang, Y. Kikukawa, K. Yamaguchi and N. Mizuno, *Angew. Chem. Int. Ed.*, 2014, **53**, 5356-5360.
